# Supplementary material for: Multipopulational Transcriptome Analysis of Post-Weaned Beef Cattle at Arrival Further Validates Candidate Biomarkers for Predicting Clinical Bovine Respiratory Disease
Source: Research Square preprint supplement (doi:10.21203/rs.3.rs-600364/v1), 2021-06-16
Supplement: Supplementary file 1 [file c29cfc9039bcd7e1b9a6e5f4.xlsx]

## Sheet: S1
Table S1. Metadata of cattle selected from 2017 population.
ID	BRD	Vac	Deworm	Pen	FEC.D0	Wt.D0	Wt.D12	ADG12	Wt.D26	ADG26	Wt.D82	ADG82	Sex	Temp.D0	Died	#Treament	Datetotreat1	Temp1	Score_trt1	Datetotreat2	Temp2	Score_trt2
104	0	0	0	12	172	458	515	4.75	563	4.03846	738	3.41463	B	103.4	0	0
115	0	0	1	9	1425	498	566	5.66667	618	4.61538	787	3.52439	S	102.4	0	0
119	0	1	1	2	945	480	511	2.58333	547	2.57692	733	3.08537	B	103.7	0	0
130	0	1	0	15	750	461	465	0.333333	523	2.38462	695	2.85366	B	102.8	0	0
155	0	0	1	7	285	495	504	0.75	575	3.07692	780	3.47561	B	102.2	0	0
160	0	1	0	1	505	481	528	3.91667	558	2.96154	663	2.21951	B	103.2	0	0
162	0	1	0	15	485	484	516	2.66667	579	3.65385	767	3.45122	S	100.9	0	0
169	0	1	0	17	460	477	487	0.833333	533	2.15385	661	2.2439	B	103.6	0	0
177	0	0	1	7	160	485	481	-0.333333	535	1.92308	731	3	B	103.2	0	0
181	0	0	0	18	165	461	481	1.66667	527	2.53846	693	2.82927	B	104.5	0	0
195	0	0	1	14	695	459	490	2.58333	527	2.61538	717	3.14634	B	104.2	0	0
199	0	1	1	2	925	467	480	1.08333	491	0.923077	681	2.60976	B	103	0	0
105	1	0	1	8	735	498	530	2.66667	591	3.57692	763	3.23171	B	104.1	0	1	10	104.9	1
109	1	1	0	19	3060	503	528	2.08333	561	2.23077	674	2.08537	B	103.1	0	1	7	104	1
123	1	1	1	20	300	432	452	1.66667	483	1.96154	613	2.20732	B	104.4	0	2	11	104.2	1	42	104.6	1
125	1	0	0	6	925	442	436	-0.5	428	-0.538462	554	1.36585	B	102.3	0	1	13	104.4	1
133	1	0	1	14	1360	515	508	-0.583333	532	0.653846	660	1.76829	B	103.5	0	1	12	105.3	1
139	1	0	0	18	630	468	501	2.75	558	3.46154	731	3.20732	S	102.9	0	2	8	106.8	1	21	104.1	1
156	1	1	1	3	370	468	460	-0.666667	527	2.26923	687	2.67073	B	102.4	0	2	6	104.3	1	42	104	1
158	1	1	1	10	360	471	478	0.583333	521	1.92308	639	2.04878	B	103.8	0	1	9	105	1
167	1	1	0	16	280	468	486	1.5	518	1.92308	672	2.4878	B	103.6	0	1	7	104	1
168	1	1	0	19	660	443	467	2	535	3.53846	673	2.80488	S	102.6	0	1	8	104.8	1
185	1	1	1	11	410	515	501	-1.16667	547	1.23077	679	2	B	102.9	0	1	12	104.2	1
187	1	0	1	14	45	481	453	-2.33333	501	0.769231	595	1.39024	B	104.4	0	1	11	105.8	1

## Sheet: S2
Table S2. Metadata of cattle selected from 2019 population.
ID	BRD	Pen	Vac	Deworm	FEC.D0	Wt.D0	Wt.D14	ADG14	Wt.D28	ADG28	Wt.D42	ADG42	Wt.D60	ADG60	Sex	Temp.D0	Died	Datedeath	#Treatment	Datetotreat1	Score_trt1	Temp1	Datetotreat2	Score_trt2	Temp2	Datetotreat3	Score_trt3	Temp3
113	0	6	1	1	2450	500	537	2.64286	578	2.78571	588	2.09524	629	2.15	S	103.4	0		0
121	0	5	1	1	600	573	605	2.28571	675	3.64286	699	3	716	2.38333	S	102.5	0		0
134	0	1	1	1	0	579	615	2.57143	658	2.82143	703	2.95238	737	2.63333	S	102.9	0		0
197	0	1	1	1	475	537	577	2.85714	625	3.14286	671	3.19048	695	2.63333	S	102.2	0		0
205	0	2	1	1	25	515	546	2.21429	594	2.82143	633	2.80952	648	2.21667	S	102.6	0		0
211	0	3	1	1	375	517	549	2.28571	593	2.71429	631	2.71429	644	2.11667	S	101.4	0		0
212	0	1	1	1	950	485	558	5.21429	561	2.71429	634	3.54762	666	3.01667	S	103.4	0		0
254	0	3	1	1	125	576	638	4.42857	701	4.46429	734	3.7619	731	2.58333	S	102.5	0		0
255	0	1	1	1	1000	479	542	4.5	573	3.35714	611	3.14286	628	2.48333	S	102.5	0		0
272	0	3	1	1	450	514	552	2.71429	620	3.78571	635	2.88095	671	2.61667	S	102.6	0		0
266	0	5	1	1	25	528	579	3.64286	618	3.21429	640	2.66667	671	2.38333	S	102.3	0		0
295	0	7	1	1	0	501	506	0.357143	557	2	598	2.30952	626	2.08333	S	102.8	0		0
118	1	3	1	1	450	451	428	-1.64286	402	-1.75	423	-0.666667	441	-0.166667	S	102.8	0		3	9	1	105.8	12	2	102.5	19	3	N/A
155	1	3	1	1	250	498	N/A	N/A	N/A	N/A	N/A	N/A	N/A	N/A	S	101.7	1	14	2	4	1	106	11	3	104.6
166	1	6	1	1	300	511	510	-0.0714286	552	1.46429	559	1.14286	587	1.26667	S	102.2	0		1	3	1	104.9
175	1	1	1	1	375	457	N/A	N/A	N/A	N/A	N/A	N/A	N/A	N/A	S	101.7	1	13	1	2	3	103.4
194	1	3	1	1	200	465	430	-2.5	449	-0.571429	493	0.666667	520	0.916667	S	103.7	0		2	1	1	104.8	36	3	104.5
210	1	7	1	1	50	510	496	-1	526	0.571429	508	-0.047619	567	0.95	S	102.3	0		2	4	1	104.4	42	3	103.2
246	1	2	1	1	150	516	529	0.928571	506	-0.357143	530	0.333333	530	0.233333	S	105.1	0		2	6	1	104.9	42	3	102.3
248	1	2	1	1	600	482	457	-1.78571	495	0.464286	516	0.809524	528	0.766667	S	103.6	0		1	3	2	104.7
252	1	3	1	1	0	531	485	-3.28571	480	-1.82143	520	-0.261905	N/A	N/A	S	103	1	53	3	14	2	105.6	24	3	103.6	28	3	104.7
274	1	1	1	1	75	528	568	2.85714	553	0.892857	N/A	N/A	N/A	N/A	S	102.6	1	32	3	1	2	104.7	22	3	104.6	32	3	N/A
285	1	2	1	1	200	523	535	0.857143	594	2.53571	646	2.92857	602	1.31667	S	102.2	0		1	7	1	104.8
287	1	3	1	1	600	536	470	-4.71429	532	-0.142857	569	0.785714	558	0.366667	S	103.1	0		1	14	1	104

## Sheet: S3
Table S3. Mapping statistics from HISAT2 against the ARS-UCD1.2 genome assembly.
104-2017_S10_L002	105-2017_S11_L002	109-2017_S12_L002	113-2019_S34_L002	115-2017_S13_L002	118-2019_S35_L002	119-2017_S14_L002	121-2019_S36_L002	123-2017_S15_L002	125-2017_S16_L002	130-2017_S17_L002	133-2017_S18_L002	134-2019_S37_L002	139-2017_S19_L002	155-2017_S20_L002	155-2019_S38_L002	156-2017_S21_L002	158-2017_S22_L002	160-2017_S23_L002	162-2017_S24_L002	166-2019_S39_L002	167-2017_S25_L002	168-2017_S26_L002	169-2017_S27_L002	175-2019_S40_L002	177-2017_S28_L002	181-2017_S29_L002	185-2017_S30_L002	187-2017_S31_L002	194-2019_S41_L002	195-2017_S32_L002	197-2019_S42_L002	199-2017_S33_L002	205-2019_S43_L002	210-2019_S44_L002	211-2019_S45_L002	212-2019_S46_L002	246-2019_S47_L002	248-2019_S48_L002	252-2019_S49_L002	254-2019_S50_L002	255-2019_S51_L002	266-2019_S52_L002	272-2019_S53_L002	274-2019_S54_L002	285-2019_S55_L002	287-2019_S56_L002	295-2019_S57_L002
51441490 reads; of these:	51365500 reads; of these:	48889455 reads; of these:	51570313 reads; of these:	43032740 reads; of these:	44984049 reads; of these:	49663523 reads; of these:	48019768 reads; of these:	52673802 reads; of these:	59054305 reads; of these:	46401836 reads; of these:	49396696 reads; of these:	55188284 reads; of these:	46124557 reads; of these:	46827071 reads; of these:	46938772 reads; of these:	42989610 reads; of these:	42961368 reads; of these:	49230510 reads; of these:	43749175 reads; of these:	48194725 reads; of these:	43292355 reads; of these:	51226634 reads; of these:	51782207 reads; of these:	48675484 reads; of these:	50950495 reads; of these:	50126924 reads; of these:	46475965 reads; of these:	48886812 reads; of these:	42746827 reads; of these:	42847586 reads; of these:	43776094 reads; of these:	49466254 reads; of these:	58610510 reads; of these:	47973083 reads; of these:	44402399 reads; of these:	43391255 reads; of these:	43537985 reads; of these:	43834569 reads; of these:	44785533 reads; of these:	47112145 reads; of these:	43761069 reads; of these:	53153489 reads; of these:	51326171 reads; of these:	49166258 reads; of these:	51395160 reads; of these:	44049502 reads; of these:	43477833 reads; of these:
50359815 (97.90%) were paired; of these:	50227394 (97.78%) were paired; of these:	47835697 (97.84%) were paired; of these:	50372848 (97.68%) were paired; of these:	42051320 (97.72%) were paired; of these:	43932686 (97.66%) were paired; of these:	48549754 (97.76%) were paired; of these:	46958833 (97.79%) were paired; of these:	51408609 (97.60%) were paired; of these:	57629913 (97.59%) were paired; of these:	45224348 (97.46%) were paired; of these:	48317174 (97.81%) were paired; of these:	53848940 (97.57%) were paired; of these:	45137722 (97.86%) were paired; of these:	45900792 (98.02%) were paired; of these:	45868078 (97.72%) were paired; of these:	42158816 (98.07%) were paired; of these:	42056507 (97.89%) were paired; of these:	48039505 (97.58%) were paired; of these:	42795813 (97.82%) were paired; of these:	47209670 (97.96%) were paired; of these:	42156689 (97.38%) were paired; of these:	50003468 (97.61%) were paired; of these:	50222394 (96.99%) were paired; of these:	47536202 (97.66%) were paired; of these:	49885163 (97.91%) were paired; of these:	48956543 (97.67%) were paired; of these:	45484242 (97.87%) were paired; of these:	47795601 (97.77%) were paired; of these:	41876548 (97.96%) were paired; of these:	41942648 (97.89%) were paired; of these:	42682524 (97.50%) were paired; of these:	48190625 (97.42%) were paired; of these:	57079849 (97.39%) were paired; of these:	46774107 (97.50%) were paired; of these:	43436385 (97.82%) were paired; of these:	42358064 (97.62%) were paired; of these:	42430474 (97.46%) were paired; of these:	42689797 (97.39%) were paired; of these:	43618629 (97.39%) were paired; of these:	46046702 (97.74%) were paired; of these:	42507713 (97.14%) were paired; of these:	51819485 (97.49%) were paired; of these:	49735070 (96.90%) were paired; of these:	47835613 (97.29%) were paired; of these:	50073634 (97.43%) were paired; of these:	42961031 (97.53%) were paired; of these:	42378652 (97.47%) were paired; of these:
1998883 (3.97%) aligned concordantly 0 times	1986432 (3.95%) aligned concordantly 0 times	1836318 (3.84%) aligned concordantly 0 times	2354544 (4.67%) aligned concordantly 0 times	1659950 (3.95%) aligned concordantly 0 times	1744900 (3.97%) aligned concordantly 0 times	1860343 (3.83%) aligned concordantly 0 times	1658344 (3.53%) aligned concordantly 0 times	1815703 (3.53%) aligned concordantly 0 times	2284030 (3.96%) aligned concordantly 0 times	2052508 (4.54%) aligned concordantly 0 times	1875524 (3.88%) aligned concordantly 0 times	2274194 (4.22%) aligned concordantly 0 times	1746715 (3.87%) aligned concordantly 0 times	1840357 (4.01%) aligned concordantly 0 times	1945990 (4.24%) aligned concordantly 0 times	1772278 (4.20%) aligned concordantly 0 times	1994745 (4.74%) aligned concordantly 0 times	1908598 (3.97%) aligned concordantly 0 times	1738788 (4.06%) aligned concordantly 0 times	1843120 (3.90%) aligned concordantly 0 times	1637869 (3.89%) aligned concordantly 0 times	1959994 (3.92%) aligned concordantly 0 times	2305563 (4.59%) aligned concordantly 0 times	2032651 (4.28%) aligned concordantly 0 times	1661459 (3.33%) aligned concordantly 0 times	1676592 (3.42%) aligned concordantly 0 times	1724946 (3.79%) aligned concordantly 0 times	1853410 (3.88%) aligned concordantly 0 times	1531266 (3.66%) aligned concordantly 0 times	1670074 (3.98%) aligned concordantly 0 times	1646411 (3.86%) aligned concordantly 0 times	1879886 (3.90%) aligned concordantly 0 times	2419749 (4.24%) aligned concordantly 0 times	1760938 (3.76%) aligned concordantly 0 times	2006367 (4.62%) aligned concordantly 0 times	1705952 (4.03%) aligned concordantly 0 times	1934103 (4.56%) aligned concordantly 0 times	1691029 (3.96%) aligned concordantly 0 times	1708010 (3.92%) aligned concordantly 0 times	1694209 (3.68%) aligned concordantly 0 times	1912330 (4.50%) aligned concordantly 0 times	2214728 (4.27%) aligned concordantly 0 times	2425605 (4.88%) aligned concordantly 0 times	2460823 (5.14%) aligned concordantly 0 times	1921842 (3.84%) aligned concordantly 0 times	1822271 (4.24%) aligned concordantly 0 times	1968958 (4.65%) aligned concordantly 0 times
46369081 (92.08%) aligned concordantly exactly 1 time	45973731 (91.53%) aligned concordantly exactly 1 time	43813464 (91.59%) aligned concordantly exactly 1 time	45514080 (90.35%) aligned concordantly exactly 1 time	38628128 (91.86%) aligned concordantly exactly 1 time	39836285 (90.68%) aligned concordantly exactly 1 time	44812325 (92.30%) aligned concordantly exactly 1 time	43278677 (92.16%) aligned concordantly exactly 1 time	47628530 (92.65%) aligned concordantly exactly 1 time	52881112 (91.76%) aligned concordantly exactly 1 time	41369495 (91.48%) aligned concordantly exactly 1 time	44485095 (92.07%) aligned concordantly exactly 1 time	49304425 (91.56%) aligned concordantly exactly 1 time	41333079 (91.57%) aligned concordantly exactly 1 time	41716326 (90.88%) aligned concordantly exactly 1 time	41888474 (91.32%) aligned concordantly exactly 1 time	38531418 (91.40%) aligned concordantly exactly 1 time	38079310 (90.54%) aligned concordantly exactly 1 time	44281533 (92.18%) aligned concordantly exactly 1 time	38981724 (91.09%) aligned concordantly exactly 1 time	43270310 (91.66%) aligned concordantly exactly 1 time	38855888 (92.17%) aligned concordantly exactly 1 time	46014704 (92.02%) aligned concordantly exactly 1 time	45540850 (90.68%) aligned concordantly exactly 1 time	43529874 (91.57%) aligned concordantly exactly 1 time	45995484 (92.20%) aligned concordantly exactly 1 time	45625080 (93.20%) aligned concordantly exactly 1 time	41889169 (92.10%) aligned concordantly exactly 1 time	43874427 (91.80%) aligned concordantly exactly 1 time	38624397 (92.23%) aligned concordantly exactly 1 time	38429865 (91.62%) aligned concordantly exactly 1 time	38875900 (91.08%) aligned concordantly exactly 1 time	44288128 (91.90%) aligned concordantly exactly 1 time	51887401 (90.90%) aligned concordantly exactly 1 time	43060393 (92.06%) aligned concordantly exactly 1 time	39377832 (90.66%) aligned concordantly exactly 1 time	38924079 (91.89%) aligned concordantly exactly 1 time	38786119 (91.41%) aligned concordantly exactly 1 time	39087004 (91.56%) aligned concordantly exactly 1 time	40312594 (92.42%) aligned concordantly exactly 1 time	42390393 (92.06%) aligned concordantly exactly 1 time	38196911 (89.86%) aligned concordantly exactly 1 time	47004863 (90.71%) aligned concordantly exactly 1 time	44888227 (90.25%) aligned concordantly exactly 1 time	43384695 (90.70%) aligned concordantly exactly 1 time	45852829 (91.57%) aligned concordantly exactly 1 time	38838734 (90.40%) aligned concordantly exactly 1 time	38585635 (91.05%) aligned concordantly exactly 1 time
1991851 (3.96%) aligned concordantly >1 times	2267231 (4.51%) aligned concordantly >1 times	2185915 (4.57%) aligned concordantly >1 times	2504224 (4.97%) aligned concordantly >1 times	1763242 (4.19%) aligned concordantly >1 times	2351501 (5.35%) aligned concordantly >1 times	1877086 (3.87%) aligned concordantly >1 times	2021812 (4.31%) aligned concordantly >1 times	1964376 (3.82%) aligned concordantly >1 times	2464771 (4.28%) aligned concordantly >1 times	1802345 (3.99%) aligned concordantly >1 times	1956555 (4.05%) aligned concordantly >1 times	2270321 (4.22%) aligned concordantly >1 times	2057928 (4.56%) aligned concordantly >1 times	2344109 (5.11%) aligned concordantly >1 times	2033614 (4.43%) aligned concordantly >1 times	1855120 (4.40%) aligned concordantly >1 times	1982452 (4.71%) aligned concordantly >1 times	1849374 (3.85%) aligned concordantly >1 times	2075301 (4.85%) aligned concordantly >1 times	2096240 (4.44%) aligned concordantly >1 times	1662932 (3.94%) aligned concordantly >1 times	2028770 (4.06%) aligned concordantly >1 times	2375981 (4.73%) aligned concordantly >1 times	1973677 (4.15%) aligned concordantly >1 times	2228220 (4.47%) aligned concordantly >1 times	1654871 (3.38%) aligned concordantly >1 times	1870127 (4.11%) aligned concordantly >1 times	2067764 (4.33%) aligned concordantly >1 times	1720885 (4.11%) aligned concordantly >1 times	1842709 (4.39%) aligned concordantly >1 times	2160213 (5.06%) aligned concordantly >1 times	2022611 (4.20%) aligned concordantly >1 times	2772699 (4.86%) aligned concordantly >1 times	1952776 (4.17%) aligned concordantly >1 times	2052186 (4.72%) aligned concordantly >1 times	1728033 (4.08%) aligned concordantly >1 times	1710252 (4.03%) aligned concordantly >1 times	1911764 (4.48%) aligned concordantly >1 times	1598025 (3.66%) aligned concordantly >1 times	1962100 (4.26%) aligned concordantly >1 times	2398472 (5.64%) aligned concordantly >1 times	2599894 (5.02%) aligned concordantly >1 times	2421238 (4.87%) aligned concordantly >1 times	1990095 (4.16%) aligned concordantly >1 times	2298963 (4.59%) aligned concordantly >1 times	2300026 (5.35%) aligned concordantly >1 times	1824059 (4.30%) aligned concordantly >1 times
----	----	----	----	----	----	----	----	----	----	----	----	----	----	----	----	----	----	----	----	----	----	----	----	----	----	----	----	----	----	----	----	----	----	----	----	----	----	----	----	----	----	----	----	----	----	----	----
1998883 pairs aligned concordantly 0 times; of these:	1986432 pairs aligned concordantly 0 times; of these:	1836318 pairs aligned concordantly 0 times; of these:	2354544 pairs aligned concordantly 0 times; of these:	1659950 pairs aligned concordantly 0 times; of these:	1744900 pairs aligned concordantly 0 times; of these:	1860343 pairs aligned concordantly 0 times; of these:	1658344 pairs aligned concordantly 0 times; of these:	1815703 pairs aligned concordantly 0 times; of these:	2284030 pairs aligned concordantly 0 times; of these:	2052508 pairs aligned concordantly 0 times; of these:	1875524 pairs aligned concordantly 0 times; of these:	2274194 pairs aligned concordantly 0 times; of these:	1746715 pairs aligned concordantly 0 times; of these:	1840357 pairs aligned concordantly 0 times; of these:	1945990 pairs aligned concordantly 0 times; of these:	1772278 pairs aligned concordantly 0 times; of these:	1994745 pairs aligned concordantly 0 times; of these:	1908598 pairs aligned concordantly 0 times; of these:	1738788 pairs aligned concordantly 0 times; of these:	1843120 pairs aligned concordantly 0 times; of these:	1637869 pairs aligned concordantly 0 times; of these:	1959994 pairs aligned concordantly 0 times; of these:	2305563 pairs aligned concordantly 0 times; of these:	2032651 pairs aligned concordantly 0 times; of these:	1661459 pairs aligned concordantly 0 times; of these:	1676592 pairs aligned concordantly 0 times; of these:	1724946 pairs aligned concordantly 0 times; of these:	1853410 pairs aligned concordantly 0 times; of these:	1531266 pairs aligned concordantly 0 times; of these:	1670074 pairs aligned concordantly 0 times; of these:	1646411 pairs aligned concordantly 0 times; of these:	1879886 pairs aligned concordantly 0 times; of these:	2419749 pairs aligned concordantly 0 times; of these:	1760938 pairs aligned concordantly 0 times; of these:	2006367 pairs aligned concordantly 0 times; of these:	1705952 pairs aligned concordantly 0 times; of these:	1934103 pairs aligned concordantly 0 times; of these:	1691029 pairs aligned concordantly 0 times; of these:	1708010 pairs aligned concordantly 0 times; of these:	1694209 pairs aligned concordantly 0 times; of these:	1912330 pairs aligned concordantly 0 times; of these:	2214728 pairs aligned concordantly 0 times; of these:	2425605 pairs aligned concordantly 0 times; of these:	2460823 pairs aligned concordantly 0 times; of these:	1921842 pairs aligned concordantly 0 times; of these:	1822271 pairs aligned concordantly 0 times; of these:	1968958 pairs aligned concordantly 0 times; of these:
66958 (3.35%) aligned discordantly 1 time	91219 (4.59%) aligned discordantly 1 time	62818 (3.42%) aligned discordantly 1 time	75748 (3.22%) aligned discordantly 1 time	80556 (4.85%) aligned discordantly 1 time	79628 (4.56%) aligned discordantly 1 time	116508 (6.26%) aligned discordantly 1 time	77786 (4.69%) aligned discordantly 1 time	95830 (5.28%) aligned discordantly 1 time	161821 (7.08%) aligned discordantly 1 time	146261 (7.13%) aligned discordantly 1 time	117298 (6.25%) aligned discordantly 1 time	139480 (6.13%) aligned discordantly 1 time	106738 (6.11%) aligned discordantly 1 time	74999 (4.08%) aligned discordantly 1 time	121902 (6.26%) aligned discordantly 1 time	112001 (6.32%) aligned discordantly 1 time	100941 (5.06%) aligned discordantly 1 time	165834 (8.69%) aligned discordantly 1 time	129546 (7.45%) aligned discordantly 1 time	99401 (5.39%) aligned discordantly 1 time	112271 (6.85%) aligned discordantly 1 time	104971 (5.36%) aligned discordantly 1 time	145687 (6.32%) aligned discordantly 1 time	163856 (8.06%) aligned discordantly 1 time	85279 (5.13%) aligned discordantly 1 time	116096 (6.92%) aligned discordantly 1 time	143379 (8.31%) aligned discordantly 1 time	90242 (4.87%) aligned discordantly 1 time	64027 (4.18%) aligned discordantly 1 time	106585 (6.38%) aligned discordantly 1 time	86938 (5.28%) aligned discordantly 1 time	86282 (4.59%) aligned discordantly 1 time	137152 (5.67%) aligned discordantly 1 time	175576 (9.97%) aligned discordantly 1 time	155609 (7.76%) aligned discordantly 1 time	132639 (7.78%) aligned discordantly 1 time	142810 (7.38%) aligned discordantly 1 time	148585 (8.79%) aligned discordantly 1 time	91331 (5.35%) aligned discordantly 1 time	101410 (5.99%) aligned discordantly 1 time	165179 (8.64%) aligned discordantly 1 time	140330 (6.34%) aligned discordantly 1 time	219418 (9.05%) aligned discordantly 1 time	287562 (11.69%) aligned discordantly 1 time	132746 (6.91%) aligned discordantly 1 time	101435 (5.57%) aligned discordantly 1 time	134888 (6.85%) aligned discordantly 1 time
----	----	----	----	----	----	----	----	----	----	----	----	----	----	----	----	----	----	----	----	----	----	----	----	----	----	----	----	----	----	----	----	----	----	----	----	----	----	----	----	----	----	----	----	----	----	----	----
1931925 pairs aligned 0 times concordantly or discordantly; of these:	1895213 pairs aligned 0 times concordantly or discordantly; of these:	1773500 pairs aligned 0 times concordantly or discordantly; of these:	2278796 pairs aligned 0 times concordantly or discordantly; of these:	1579394 pairs aligned 0 times concordantly or discordantly; of these:	1665272 pairs aligned 0 times concordantly or discordantly; of these:	1743835 pairs aligned 0 times concordantly or discordantly; of these:	1580558 pairs aligned 0 times concordantly or discordantly; of these:	1719873 pairs aligned 0 times concordantly or discordantly; of these:	2122209 pairs aligned 0 times concordantly or discordantly; of these:	1906247 pairs aligned 0 times concordantly or discordantly; of these:	1758226 pairs aligned 0 times concordantly or discordantly; of these:	2134714 pairs aligned 0 times concordantly or discordantly; of these:	1639977 pairs aligned 0 times concordantly or discordantly; of these:	1765358 pairs aligned 0 times concordantly or discordantly; of these:	1824088 pairs aligned 0 times concordantly or discordantly; of these:	1660277 pairs aligned 0 times concordantly or discordantly; of these:	1893804 pairs aligned 0 times concordantly or discordantly; of these:	1742764 pairs aligned 0 times concordantly or discordantly; of these:	1609242 pairs aligned 0 times concordantly or discordantly; of these:	1743719 pairs aligned 0 times concordantly or discordantly; of these:	1525598 pairs aligned 0 times concordantly or discordantly; of these:	1855023 pairs aligned 0 times concordantly or discordantly; of these:	2159876 pairs aligned 0 times concordantly or discordantly; of these:	1868795 pairs aligned 0 times concordantly or discordantly; of these:	1576180 pairs aligned 0 times concordantly or discordantly; of these:	1560496 pairs aligned 0 times concordantly or discordantly; of these:	1581567 pairs aligned 0 times concordantly or discordantly; of these:	1763168 pairs aligned 0 times concordantly or discordantly; of these:	1467239 pairs aligned 0 times concordantly or discordantly; of these:	1563489 pairs aligned 0 times concordantly or discordantly; of these:	1559473 pairs aligned 0 times concordantly or discordantly; of these:	1793604 pairs aligned 0 times concordantly or discordantly; of these:	2282597 pairs aligned 0 times concordantly or discordantly; of these:	1585362 pairs aligned 0 times concordantly or discordantly; of these:	1850758 pairs aligned 0 times concordantly or discordantly; of these:	1573313 pairs aligned 0 times concordantly or discordantly; of these:	1791293 pairs aligned 0 times concordantly or discordantly; of these:	1542444 pairs aligned 0 times concordantly or discordantly; of these:	1616679 pairs aligned 0 times concordantly or discordantly; of these:	1592799 pairs aligned 0 times concordantly or discordantly; of these:	1747151 pairs aligned 0 times concordantly or discordantly; of these:	2074398 pairs aligned 0 times concordantly or discordantly; of these:	2206187 pairs aligned 0 times concordantly or discordantly; of these:	2173261 pairs aligned 0 times concordantly or discordantly; of these:	1789096 pairs aligned 0 times concordantly or discordantly; of these:	1720836 pairs aligned 0 times concordantly or discordantly; of these:	1834070 pairs aligned 0 times concordantly or discordantly; of these:
3863850 mates make up the pairs; of these:	3790426 mates make up the pairs; of these:	3547000 mates make up the pairs; of these:	4557592 mates make up the pairs; of these:	3158788 mates make up the pairs; of these:	3330544 mates make up the pairs; of these:	3487670 mates make up the pairs; of these:	3161116 mates make up the pairs; of these:	3439746 mates make up the pairs; of these:	4244418 mates make up the pairs; of these:	3812494 mates make up the pairs; of these:	3516452 mates make up the pairs; of these:	4269428 mates make up the pairs; of these:	3279954 mates make up the pairs; of these:	3530716 mates make up the pairs; of these:	3648176 mates make up the pairs; of these:	3320554 mates make up the pairs; of these:	3787608 mates make up the pairs; of these:	3485528 mates make up the pairs; of these:	3218484 mates make up the pairs; of these:	3487438 mates make up the pairs; of these:	3051196 mates make up the pairs; of these:	3710046 mates make up the pairs; of these:	4319752 mates make up the pairs; of these:	3737590 mates make up the pairs; of these:	3152360 mates make up the pairs; of these:	3120992 mates make up the pairs; of these:	3163134 mates make up the pairs; of these:	3526336 mates make up the pairs; of these:	2934478 mates make up the pairs; of these:	3126978 mates make up the pairs; of these:	3118946 mates make up the pairs; of these:	3587208 mates make up the pairs; of these:	4565194 mates make up the pairs; of these:	3170724 mates make up the pairs; of these:	3701516 mates make up the pairs; of these:	3146626 mates make up the pairs; of these:	3582586 mates make up the pairs; of these:	3084888 mates make up the pairs; of these:	3233358 mates make up the pairs; of these:	3185598 mates make up the pairs; of these:	3494302 mates make up the pairs; of these:	4148796 mates make up the pairs; of these:	4412374 mates make up the pairs; of these:	4346522 mates make up the pairs; of these:	3578192 mates make up the pairs; of these:	3441672 mates make up the pairs; of these:	3668140 mates make up the pairs; of these:
2959320 (76.59%) aligned 0 times	2800101 (73.87%) aligned 0 times	2678973 (75.53%) aligned 0 times	3010312 (66.05%) aligned 0 times	2158111 (68.32%) aligned 0 times	2408616 (72.32%) aligned 0 times	2518350 (72.21%) aligned 0 times	2311144 (73.11%) aligned 0 times	2455884 (71.40%) aligned 0 times	2905299 (68.45%) aligned 0 times	2720751 (71.36%) aligned 0 times	2478946 (70.50%) aligned 0 times	3100031 (72.61%) aligned 0 times	2346259 (71.53%) aligned 0 times	2561820 (72.56%) aligned 0 times	2581295 (70.76%) aligned 0 times	2315691 (69.74%) aligned 0 times	2849420 (75.23%) aligned 0 times	2356150 (67.60%) aligned 0 times	2223539 (69.09%) aligned 0 times	2539737 (72.83%) aligned 0 times	2159694 (70.78%) aligned 0 times	2690313 (72.51%) aligned 0 times	3030783 (70.16%) aligned 0 times	2595348 (69.44%) aligned 0 times	2231711 (70.79%) aligned 0 times	2117731 (67.85%) aligned 0 times	2190306 (69.24%) aligned 0 times	2578903 (73.13%) aligned 0 times	2147973 (73.20%) aligned 0 times	2199942 (70.35%) aligned 0 times	2245240 (71.99%) aligned 0 times	2650104 (73.88%) aligned 0 times	3371241 (73.85%) aligned 0 times	2052946 (64.75%) aligned 0 times	2550036 (68.89%) aligned 0 times	2199733 (69.91%) aligned 0 times	2547590 (71.11%) aligned 0 times	2109243 (68.37%) aligned 0 times	2328338 (72.01%) aligned 0 times	2246880 (70.53%) aligned 0 times	2399533 (68.67%) aligned 0 times	2939993 (70.86%) aligned 0 times	3028877 (68.65%) aligned 0 times	2869853 (66.03%) aligned 0 times	2489544 (69.58%) aligned 0 times	2430917 (70.63%) aligned 0 times	2685607 (73.21%) aligned 0 times
805517 (20.85%) aligned exactly 1 time	885070 (23.35%) aligned exactly 1 time	769951 (21.71%) aligned exactly 1 time	1243930 (27.29%) aligned exactly 1 time	886609 (28.07%) aligned exactly 1 time	808130 (24.26%) aligned exactly 1 time	868171 (24.89%) aligned exactly 1 time	756973 (23.95%) aligned exactly 1 time	879908 (25.58%) aligned exactly 1 time	1171075 (27.59%) aligned exactly 1 time	947935 (24.86%) aligned exactly 1 time	931048 (26.48%) aligned exactly 1 time	1017548 (23.83%) aligned exactly 1 time	829119 (25.28%) aligned exactly 1 time	833716 (23.61%) aligned exactly 1 time	929768 (25.49%) aligned exactly 1 time	876029 (26.38%) aligned exactly 1 time	837154 (22.10%) aligned exactly 1 time	1007554 (28.91%) aligned exactly 1 time	871587 (27.08%) aligned exactly 1 time	836367 (23.98%) aligned exactly 1 time	776840 (25.46%) aligned exactly 1 time	897197 (24.18%) aligned exactly 1 time	1133836 (26.25%) aligned exactly 1 time	1004639 (26.88%) aligned exactly 1 time	826365 (26.21%) aligned exactly 1 time	901491 (28.88%) aligned exactly 1 time	875443 (27.68%) aligned exactly 1 time	835524 (23.69%) aligned exactly 1 time	704816 (24.02%) aligned exactly 1 time	827506 (26.46%) aligned exactly 1 time	759483 (24.35%) aligned exactly 1 time	818198 (22.81%) aligned exactly 1 time	1036707 (22.71%) aligned exactly 1 time	1003025 (31.63%) aligned exactly 1 time	986380 (26.65%) aligned exactly 1 time	842355 (26.77%) aligned exactly 1 time	925349 (25.83%) aligned exactly 1 time	880122 (28.53%) aligned exactly 1 time	806394 (24.94%) aligned exactly 1 time	845318 (26.54%) aligned exactly 1 time	982190 (28.11%) aligned exactly 1 time	1079359 (26.02%) aligned exactly 1 time	1205289 (27.32%) aligned exactly 1 time	1323530 (30.45%) aligned exactly 1 time	966820 (27.02%) aligned exactly 1 time	895591 (26.02%) aligned exactly 1 time	865486 (23.59%) aligned exactly 1 time
99013 (2.56%) aligned >1 times	105255 (2.78%) aligned >1 times	98076 (2.77%) aligned >1 times	303350 (6.66%) aligned >1 times	114068 (3.61%) aligned >1 times	113798 (3.42%) aligned >1 times	101149 (2.90%) aligned >1 times	92999 (2.94%) aligned >1 times	103954 (3.02%) aligned >1 times	168044 (3.96%) aligned >1 times	143808 (3.77%) aligned >1 times	106458 (3.03%) aligned >1 times	151849 (3.56%) aligned >1 times	104576 (3.19%) aligned >1 times	135180 (3.83%) aligned >1 times	137113 (3.76%) aligned >1 times	128834 (3.88%) aligned >1 times	101034 (2.67%) aligned >1 times	121824 (3.50%) aligned >1 times	123358 (3.83%) aligned >1 times	111334 (3.19%) aligned >1 times	114662 (3.76%) aligned >1 times	122536 (3.30%) aligned >1 times	155133 (3.59%) aligned >1 times	137603 (3.68%) aligned >1 times	94284 (2.99%) aligned >1 times	101770 (3.26%) aligned >1 times	97385 (3.08%) aligned >1 times	111909 (3.17%) aligned >1 times	81689 (2.78%) aligned >1 times	99530 (3.18%) aligned >1 times	114223 (3.66%) aligned >1 times	118906 (3.31%) aligned >1 times	157246 (3.44%) aligned >1 times	114753 (3.62%) aligned >1 times	165100 (4.46%) aligned >1 times	104538 (3.32%) aligned >1 times	109647 (3.06%) aligned >1 times	95523 (3.10%) aligned >1 times	98626 (3.05%) aligned >1 times	93400 (2.93%) aligned >1 times	112579 (3.22%) aligned >1 times	129444 (3.12%) aligned >1 times	178208 (4.04%) aligned >1 times	153139 (3.52%) aligned >1 times	121828 (3.40%) aligned >1 times	115164 (3.35%) aligned >1 times	117047 (3.19%) aligned >1 times
1081675 (2.10%) were unpaired; of these:	1138106 (2.22%) were unpaired; of these:	1053758 (2.16%) were unpaired; of these:	1197465 (2.32%) were unpaired; of these:	981420 (2.28%) were unpaired; of these:	1051363 (2.34%) were unpaired; of these:	1113769 (2.24%) were unpaired; of these:	1060935 (2.21%) were unpaired; of these:	1265193 (2.40%) were unpaired; of these:	1424392 (2.41%) were unpaired; of these:	1177488 (2.54%) were unpaired; of these:	1079522 (2.19%) were unpaired; of these:	1339344 (2.43%) were unpaired; of these:	986835 (2.14%) were unpaired; of these:	926279 (1.98%) were unpaired; of these:	1070694 (2.28%) were unpaired; of these:	830794 (1.93%) were unpaired; of these:	904861 (2.11%) were unpaired; of these:	1191005 (2.42%) were unpaired; of these:	953362 (2.18%) were unpaired; of these:	985055 (2.04%) were unpaired; of these:	1135666 (2.62%) were unpaired; of these:	1223166 (2.39%) were unpaired; of these:	1559813 (3.01%) were unpaired; of these:	1139282 (2.34%) were unpaired; of these:	1065332 (2.09%) were unpaired; of these:	1170381 (2.33%) were unpaired; of these:	991723 (2.13%) were unpaired; of these:	1091211 (2.23%) were unpaired; of these:	870279 (2.04%) were unpaired; of these:	904938 (2.11%) were unpaired; of these:	1093570 (2.50%) were unpaired; of these:	1275629 (2.58%) were unpaired; of these:	1530661 (2.61%) were unpaired; of these:	1198976 (2.50%) were unpaired; of these:	966014 (2.18%) were unpaired; of these:	1033191 (2.38%) were unpaired; of these:	1107511 (2.54%) were unpaired; of these:	1144772 (2.61%) were unpaired; of these:	1166904 (2.61%) were unpaired; of these:	1065443 (2.26%) were unpaired; of these:	1253356 (2.86%) were unpaired; of these:	1334004 (2.51%) were unpaired; of these:	1591101 (3.10%) were unpaired; of these:	1330645 (2.71%) were unpaired; of these:	1321526 (2.57%) were unpaired; of these:	1088471 (2.47%) were unpaired; of these:	1099181 (2.53%) were unpaired; of these:
60537 (5.60%) aligned 0 times	63344 (5.57%) aligned 0 times	59163 (5.61%) aligned 0 times	74599 (6.23%) aligned 0 times	53116 (5.41%) aligned 0 times	56692 (5.39%) aligned 0 times	58274 (5.23%) aligned 0 times	56652 (5.34%) aligned 0 times	66905 (5.29%) aligned 0 times	75720 (5.32%) aligned 0 times	62373 (5.30%) aligned 0 times	56974 (5.28%) aligned 0 times	71977 (5.37%) aligned 0 times	53486 (5.42%) aligned 0 times	52852 (5.71%) aligned 0 times	58542 (5.47%) aligned 0 times	47560 (5.72%) aligned 0 times	52852 (5.84%) aligned 0 times	59601 (5.00%) aligned 0 times	47951 (5.03%) aligned 0 times	54119 (5.49%) aligned 0 times	55915 (4.92%) aligned 0 times	63841 (5.22%) aligned 0 times	81957 (5.25%) aligned 0 times	61636 (5.41%) aligned 0 times	53067 (4.98%) aligned 0 times	57907 (4.95%) aligned 0 times	49804 (5.02%) aligned 0 times	59994 (5.50%) aligned 0 times	46933 (5.39%) aligned 0 times	48190 (5.33%) aligned 0 times	55393 (5.07%) aligned 0 times	65257 (5.12%) aligned 0 times	81464 (5.32%) aligned 0 times	55334 (4.62%) aligned 0 times	53405 (5.53%) aligned 0 times	51126 (4.95%) aligned 0 times	61050 (5.51%) aligned 0 times	53877 (4.71%) aligned 0 times	62035 (5.32%) aligned 0 times	53295 (5.00%) aligned 0 times	62218 (4.96%) aligned 0 times	70686 (5.30%) aligned 0 times	80384 (5.05%) aligned 0 times	69031 (5.19%) aligned 0 times	65803 (4.98%) aligned 0 times	56414 (5.18%) aligned 0 times	61496 (5.59%) aligned 0 times
969654 (89.64%) aligned exactly 1 time	1011352 (88.86%) aligned exactly 1 time	936296 (88.85%) aligned exactly 1 time	1050535 (87.73%) aligned exactly 1 time	880192 (89.69%) aligned exactly 1 time	922189 (87.71%) aligned exactly 1 time	1003696 (90.12%) aligned exactly 1 time	949925 (89.54%) aligned exactly 1 time	1141516 (90.22%) aligned exactly 1 time	1279387 (89.82%) aligned exactly 1 time	1059980 (90.02%) aligned exactly 1 time	972445 (90.08%) aligned exactly 1 time	1201796 (89.73%) aligned exactly 1 time	877235 (88.89%) aligned exactly 1 time	811514 (87.61%) aligned exactly 1 time	956152 (89.30%) aligned exactly 1 time	737041 (88.72%) aligned exactly 1 time	798325 (88.23%) aligned exactly 1 time	1077819 (90.50%) aligned exactly 1 time	846405 (88.78%) aligned exactly 1 time	878555 (89.19%) aligned exactly 1 time	1029059 (90.61%) aligned exactly 1 time	1102696 (90.15%) aligned exactly 1 time	1392307 (89.26%) aligned exactly 1 time	1024471 (89.92%) aligned exactly 1 time	953444 (89.50%) aligned exactly 1 time	1067364 (91.20%) aligned exactly 1 time	893557 (90.10%) aligned exactly 1 time	977186 (89.55%) aligned exactly 1 time	782084 (89.87%) aligned exactly 1 time	811221 (89.64%) aligned exactly 1 time	969079 (88.62%) aligned exactly 1 time	1148575 (90.04%) aligned exactly 1 time	1355285 (88.54%) aligned exactly 1 time	1087374 (90.69%) aligned exactly 1 time	856306 (88.64%) aligned exactly 1 time	934442 (90.44%) aligned exactly 1 time	997358 (90.05%) aligned exactly 1 time	1029287 (89.91%) aligned exactly 1 time	1056721 (90.56%) aligned exactly 1 time	956342 (89.76%) aligned exactly 1 time	1099397 (87.72%) aligned exactly 1 time	1180500 (88.49%) aligned exactly 1 time	1415064 (88.94%) aligned exactly 1 time	1198334 (90.06%) aligned exactly 1 time	1181861 (89.43%) aligned exactly 1 time	957992 (88.01%) aligned exactly 1 time	981126 (89.26%) aligned exactly 1 time
51484 (4.76%) aligned >1 times	63410 (5.57%) aligned >1 times	58299 (5.53%) aligned >1 times	72331 (6.04%) aligned >1 times	48112 (4.90%) aligned >1 times	72482 (6.89%) aligned >1 times	51799 (4.65%) aligned >1 times	54358 (5.12%) aligned >1 times	56772 (4.49%) aligned >1 times	69285 (4.86%) aligned >1 times	55135 (4.68%) aligned >1 times	50103 (4.64%) aligned >1 times	65571 (4.90%) aligned >1 times	56114 (5.69%) aligned >1 times	61913 (6.68%) aligned >1 times	56000 (5.23%) aligned >1 times	46193 (5.56%) aligned >1 times	53684 (5.93%) aligned >1 times	53585 (4.50%) aligned >1 times	59006 (6.19%) aligned >1 times	52381 (5.32%) aligned >1 times	50692 (4.46%) aligned >1 times	56629 (4.63%) aligned >1 times	85549 (5.48%) aligned >1 times	53175 (4.67%) aligned >1 times	58821 (5.52%) aligned >1 times	45110 (3.85%) aligned >1 times	48362 (4.88%) aligned >1 times	54031 (4.95%) aligned >1 times	41262 (4.74%) aligned >1 times	45527 (5.03%) aligned >1 times	69098 (6.32%) aligned >1 times	61797 (4.84%) aligned >1 times	93912 (6.14%) aligned >1 times	56268 (4.69%) aligned >1 times	56303 (5.83%) aligned >1 times	47623 (4.61%) aligned >1 times	49103 (4.43%) aligned >1 times	61608 (5.38%) aligned >1 times	48148 (4.13%) aligned >1 times	55806 (5.24%) aligned >1 times	91741 (7.32%) aligned >1 times	82818 (6.21%) aligned >1 times	95653 (6.01%) aligned >1 times	63280 (4.76%) aligned >1 times	73862 (5.59%) aligned >1 times	74065 (6.80%) aligned >1 times	56559 (5.15%) aligned >1 times
97.03% overall alignment rate	97.18% overall alignment rate	97.17% overall alignment rate	96.97% overall alignment rate	97.40% overall alignment rate	97.23% overall alignment rate	97.38% overall alignment rate	97.51% overall alignment rate	97.58% overall alignment rate	97.45% overall alignment rate	96.96% overall alignment rate	97.40% overall alignment rate	97.09% overall alignment rate	97.37% overall alignment rate	97.18% overall alignment rate	97.16% overall alignment rate	97.22% overall alignment rate	96.59% overall alignment rate	97.52% overall alignment rate	97.38% overall alignment rate	97.28% overall alignment rate	97.41% overall alignment rate	97.28% overall alignment rate	96.95% overall alignment rate	97.24% overall alignment rate	97.73% overall alignment rate	97.80% overall alignment rate	97.56% overall alignment rate	97.27% overall alignment rate	97.41% overall alignment rate	97.35% overall alignment rate	97.34% overall alignment rate	97.22% overall alignment rate	97.02% overall alignment rate	97.77% overall alignment rate	97.04% overall alignment rate	97.38% overall alignment rate	96.97% overall alignment rate	97.50% overall alignment rate	97.30% overall alignment rate	97.53% overall alignment rate	97.15% overall alignment rate	97.13% overall alignment rate	96.92% overall alignment rate	96.97% overall alignment rate	97.48% overall alignment rate	97.14% overall alignment rate	96.80% overall alignment rate

## Sheet: S4
Table S4. List of differentially expressed genes (DEGs) identified in each cohort comparison (FDR < 0.05).
gene_id	logFC_trt1vH	FDR	logFC_trt2vH	FDR	logFC_trt2vtrt1	FDR
KRT5	5.04068	2.8644e-13	0.0710868	0.994823	-4.9696	2.19393e-05
KRT10	4.75746	6.96322e-11	0.070915	0.994823	-4.68655	0.000119844
DSG1	4.09186	7.47361e-10	0.0713122	0.994823	-4.02055	0.000211284
KRT14	4.3693	1.52305e-09	-0.743495	0.924206	-5.1128	3.25669e-05
SPINK5	3.58081	5.07503e-09	-0.0313018	0.997022	-3.61211	0.000280797
KRT25	3.97685	8.06059e-08	0.083277	0.993221	-3.89357	0.0018755
ANXA4	4.36225	8.06059e-08	4.41405	4.37202e-07	0.0517957	0.999339
CDSN	3.5839	8.85002e-08	-0.385644	0.97228	-3.96954	0.000280797
CAMP	4.43726	8.93496e-08	-0.332667	0.980543	-4.76993	0.000626573
LOC112441458	4.66627	7.79485e-07	0.621224	0.956871	-4.04505	0.0182418
DSP	2.28465	2.37218e-06	-0.0478764	0.994699	-2.33253	0.0023032
CATHL3	4.06209	3.44549e-06	0.352667	0.977096	-3.70942	0.0180409
CATHL2	3.88476	4.68009e-06	0.101793	0.993221	-3.78297	0.0107426
SPP1	3.04371	5.84044e-06	0.233682	0.981565	-2.81003	0.0159892
CATHL1	4.29653	8.4296e-06	-0.15973	0.99048	-4.45626	0.00868248
NGP	3.28129	1.56217e-05	1.07259	0.735387	-2.2087	0.225281
SBSN	3.01572	2.03607e-05	-0.842592	0.853313	-3.85831	0.000464532
LOC520402	3.78272	2.07971e-05	0.672788	0.939605	-3.10993	0.0777244
PGLYRP1	2.35684	2.09731e-05	-0.2296	0.977096	-2.58644	0.00281129
DMKN	2.25364	2.09731e-05	0.212863	0.979088	-2.04078	0.0264573
AZU1	3.34612	2.51694e-05	0.17412	0.987225	-3.172	0.0261777
LOC505658	3.12176	3.7748e-05	0.77879	0.871604	-2.34297	0.164211
CD177	2.5691	4.09159e-05	-0.124435	0.987752	-2.69353	0.00907444
CEP152	4.12307	4.40065e-05	0.519287	0.967066	-3.60378	0.0702338
LOC112442318	-5.90269	6.72633e-05	-5.83268	0.00147394	0.0700095	0.999339
LOC112446744	2.85515	0.000330891	2.63385	0.00629035	-0.2213	0.999339
LOC112447761	-4.98657	0.000360253	-5.006	0.003824	-0.0194333	0.999339
LOC112441987	-6.13145	0.00104322	-1.03544	0.928845	5.09602	0.0184582
POR	-4.31274	0.00144763	0.0450386	0.996486	4.35777	0.00432595
GTF2F2	-4.02612	0.00163955	1.10601	0.78704	5.13213	0.000211284
LMF1	2.45568	0.00194245	0.619728	0.915993	-1.83595	0.352719
GYPA	2.88826	0.0024917	0.585442	0.950747	-2.30281	0.310748
FAM3B	4.05993	0.0024917	1.50801	0.757767	-2.55192	0.63416
LOC100300449	2.42999	0.00403919	0.581981	0.934397	-1.84801	0.380748
ZBTB3	-4.05671	0.00403919	-2.02856	0.485805	2.02815	0.646967
MGARP	-4.22297	0.00491055	-3.3806	0.112643	0.842374	0.999339
ABCC11	1.74653	0.00725283	0.151231	0.985049	-1.5953	0.186315
LOC619000	2.09613	0.00756198	-0.0244798	0.997022	-2.12061	0.12032
LOC616574	1.98982	0.00756198	0.700451	0.829284	-1.28937	0.647861
LOC112445749	-4.60189	0.0101484	0.422748	0.979214	5.02464	0.00868248
LOC530599	-2.69908	0.0101795	-1.96172	0.234456	0.737367	0.998938
PRG3	2.62812	0.0119464	-0.898083	0.870807	-3.5262	0.0180409
MPO	1.90347	0.0124235	-0.813413	0.789604	-2.71688	0.00541934
LOC112441477	-4.26217	0.0126344	0.248707	0.987225	4.51088	0.0151294
SH3BGRL2	1.53844	0.0130052	1.74456	0.00593741	0.20612	0.999339
CFB	2.77088	0.0143729	5.13311	4.2625e-08	2.36223	0.315753
LOC618912	2.87132	0.0161962	-0.615963	0.958766	-3.48728	0.0607719
RNASE2	2.41963	0.0163162	-0.336009	0.977096	-2.75564	0.0873971
LOC788293	-3.86396	0.0183288	-0.115392	0.993221	3.74857	0.0443186
HEMGN	2.01327	0.0183288	0.113361	0.989789	-1.89991	0.246691
LTF	1.85156	0.0183288	0.328508	0.964877	-1.52305	0.41352
CXCL12	0.747056	0.018383	0.266474	0.847757	-0.480582	0.708006
OCLN	1.1419	0.0222293	-0.1664	0.977096	-1.3083	0.058194
PPP1R13L	-1.16193	0.0254848	0.0228944	0.99497	1.18483	0.0721499
SPTA1	2.03515	0.0265636	0.496801	0.948706	-1.53834	0.587747
LOC615183	1.70163	0.0301175	-0.0222397	0.997022	-1.72387	0.194687
LOC781339	3.92622	0.0314066	-5.13287	0.0834161	-9.05909	0.000416519
LOC104974259	1.43499	0.0317448	0.233688	0.97228	-1.2013	0.42431
LOC112442433	1.8356	0.0322201	1.76877	0.0850343	-0.0668244	0.999339
FAM83F	1.91176	0.0360898	2.26514	0.009495	0.353378	0.999339
LOC781990	2.56837	0.0378757	-1.0058	0.858179	-3.57417	0.0320972
MCF2L	1.20493	0.0378757	1.23278	0.0596239	0.0278423	0.999339
TRIP10	-2.71552	0.0400436	1.00553	0.781525	3.72105	0.00281129
LOC112443816	-0.827676	0.0451279	-0.0805063	0.983005	0.74717	0.248418
LOC112449072	-5.04621	0.0528547	-6.26131	0.032369	-1.2151	0.999339
LOC100336795	-3.79101	0.0769629	1.2916	0.808103	5.08261	0.00900734
RAB8A	-3.41076	0.0813319	1.04545	0.865511	4.45621	0.0123794
CTSK	-2.28104	0.131354	0.805677	0.85498	3.08672	0.0159892
ITGA4	-1.95855	0.248526	1.53029	0.373863	3.48884	0.00159021
PKP1	1.49936	0.348627	-1.31049	0.605642	-2.80985	0.0159892
MARCO	1.31264	0.367796	2.94558	6.20827e-07	1.63293	0.219224
CLEC12A	-0.979019	0.415106	0.808619	0.440516	1.78764	0.00281129
DNAH17	-1.52115	0.443848	0.850738	0.765783	2.37189	0.0263617
BDKRB1	-1.31924	0.496803	0.770814	0.737533	2.09005	0.026051
TLL2	0.75446	0.51853	-0.490798	0.775515	-1.24526	0.0468921
CD27	-1.38315	0.546429	-2.25612	0.0334025	-0.872964	0.948064
FAM110B	1.08081	0.568425	1.73557	0.0166483	0.654763	0.966904
MS4A8	-0.765285	0.5866	0.502917	0.732801	1.2682	0.0301873
MGC126945	2.10761	0.719965	4.39006	0.00107097	2.28245	0.658546
LOC100299869	-1.68462	0.793607	1.88657	0.217979	3.57119	0.00448017
HBG	1.25141	0.793607	-1.4953	0.435225	-2.74671	0.0180409
COL5A3	-0.817723	0.837329	0.825915	0.434364	1.64364	0.0115003
LOC519132	1.50204	0.860055	3.5675	0.000197909	2.06546	0.409166
SLC9A7	1.30139	0.90403	-1.70284	0.438073	-3.00423	0.0308165
ALOX15	1.00107	0.908194	-2.49084	0.00629035	-3.49191	7.72159e-05
LOC786348	0.640199	0.999949	3.87089	1.81512e-06	3.23069	0.0106927
LOC509006	-1.57368	0.999949	5.84325	1.49109e-05	7.41693	0.000211284
LOC112446750	-0.647909	0.999949	3.75811	0.000106918	4.40602	0.000797407
PTX3	0.421396	0.999949	2.92142	0.000227308	2.50003	0.0421709
PPP1R3E	-0.623048	0.999949	-7.55188	0.000807232	-6.92884	0.0023064
MYO1H	-0.33712	0.999949	1.45854	0.000929314	1.79566	0.000416519
LOC112446749	0.0352079	0.999949	2.27601	0.00266076	2.2408	0.0290238
CALD1	-0.189116	0.999949	1.11594	0.0029879	1.30506	0.0023064
LRG1	0.0227501	0.999949	2.29219	0.003824	2.26944	0.0373549
SLC18A2	0.228535	0.999949	-1.98526	0.00450554	-2.21379	0.00195358
LOC615610	-0.0911336	0.999949	1.20307	0.0100732	1.29421	0.0211486
LOC112444524	0.0114535	0.999949	1.21313	0.0100732	1.20167	0.0495215
GP5	0.0770547	0.999949	1.37821	0.0174831	1.30115	0.109341
LST1	-0.0388291	0.999949	1.8079	0.0184058	1.84673	0.0685969
CDH2	-1.03497	0.999949	-3.96145	0.0184058	-2.92648	0.183329
BNC2	-0.00510464	0.999949	1.99851	0.0215494	2.00362	0.0942759
OLA1	1.09873	0.999949	-6.1003	0.02437	-7.19903	0.00448017
GNAO1	-0.309282	0.999949	-1.03796	0.0261451	-0.728673	0.41935
LOC104974297	-1.01358	0.999949	-3.49573	0.0265028	-2.48215	0.290855
LOC790134	-0.201267	0.999949	1.82071	0.0306156	2.02198	0.0443186
HIST1H2AC	0.312765	0.999949	1.22179	0.031109	0.909027	0.446558
KRT23	1.35791	0.999949	3.18561	0.033433	1.8277	0.817767
ARNT	0.293196	0.999949	3.05677	0.0338491	2.76357	0.258236
LOC112446054	-0.825265	0.999949	2.03418	0.0387845	2.85944	0.00573944
SERPINB4	-0.154725	0.999949	2.66663	0.0387845	2.82136	0.116546
LOC101902704	-0.626061	0.999949	-1.53852	0.0387845	-0.912462	0.689748
PAPLN	-1.30285	0.999949	2.26361	0.0596239	3.56647	0.00307193
LOC789121	0.481386	0.999949	-2.12266	0.0596239	-2.60404	0.010612
LOC112445693	0.720278	0.999949	-3.90461	0.053884	-4.62489	0.0121266
LOC100337129	0.822982	0.999949	-4.113	0.059197	-4.93598	0.0123511
LOC100848540	0.588306	0.999949	-0.916086	0.332871	-1.50439	0.0161142
GLT1D1	-0.314953	0.999949	1.2462	0.0524562	1.56115	0.0180409
SAMD9	1.08282	0.999949	-1.84651	0.289934	-2.92933	0.0182418
DCLK2	0.167504	0.999949	-1.18753	0.0596239	-1.35503	0.0264573
LOC112445621	0.964013	0.999949	-4.2207	0.112643	-5.18472	0.0264573
S100A8	-0.398386	0.999949	1.09697	0.14272	1.49535	0.0274496
LOC112445563	-1.42013	0.999949	2.13593	0.248726	3.55606	0.0276944
LOC100335828	0.194725	0.999949	-1.07632	0.0834161	-1.27105	0.0295192
RAB3IP	-0.387906	0.999949	1.03189	0.164513	1.41979	0.0301873
MRC2	0.57465	0.999949	-0.896294	0.394621	-1.47094	0.0301873
AANAT	1.23798	0.999949	-1.92593	0.388834	-3.16391	0.0320972
GULO	-1.28169	0.999949	1.56035	0.41097	2.84203	0.0373549
WFDC2	1.08206	0.999949	-1.57582	0.434364	-2.65788	0.0374555
SERPINB2	0.623325	0.999949	-1.16724	0.352418	-1.79057	0.038003
CASS4	0.537927	0.999949	-3.86996	0.0965583	-4.40789	0.0396394
RYR1	-0.261917	0.999949	1.42137	0.0596239	1.68329	0.0443186
AGO2	-0.912902	0.999949	1.08302	0.483237	1.99592	0.0498673

## Sheet: S6
Table S6. Gene ontology (GO) biological processes (BP), cellular components (CC), molecular functions (MF), and pathways for Treated 1 vs Healthy (FDR < 0.05).
GO-BP
Gene Set	Description	Size	Expect	Ratio	P Value	FDR
GO:0070268	cornification	111	0.28639	27.934	3.5826e-10	3.2713e-06
GO:0019730	antimicrobial humoral response	110	0.28381	24.664	1.1921e-08	4.998e-05
GO:0043312	neutrophil degranulation	482	1.2436	8.8452	2.6332e-08	4.998e-05
GO:0002283	neutrophil activation involved in immune response	485	1.2514	8.7905	2.806e-08	4.998e-05
GO:0042119	neutrophil activation	494	1.2746	8.6304	3.3869e-08	4.998e-05
GO:0002446	neutrophil mediated immunity	496	1.2797	8.5956	3.5297e-08	4.998e-05
GO:0036230	granulocyte activation	500	1.2901	8.5268	3.8316e-08	4.998e-05
GO:0019731	antibacterial humoral response	39	0.10062	49.69	4.8515e-08	5.1013e-05
GO:0032940	secretion by cell	1472	3.7979	4.4761	5.0281e-08	5.1013e-05
GO:0043299	leukocyte degranulation	529	1.3649	8.0593	6.8029e-08	6.2117e-05
GO:0031424	keratinization	219	0.56504	14.158	7.6385e-08	6.2592e-05
GO:0002275	myeloid cell activation involved in immune response	539	1.3907	7.9098	8.2258e-08	6.2592e-05
GO:0002444	myeloid leukocyte mediated immunity	548	1.4139	7.7799	9.727e-08	6.8321e-05
GO:0044110	growth involved in symbiotic interaction	18	0.046442	86.129	1.1448e-07	6.9686e-05
GO:0044116	growth of symbiont involved in interaction with host	18	0.046442	86.129	1.1448e-07	6.9686e-05
GO:0042742	defense response to bacterium	237	0.61148	13.083	1.403e-07	8.0065e-05
GO:0006959	humoral immune response	242	0.62438	12.813	1.6466e-07	8.844e-05
GO:0046903	secretion	1605	4.1411	4.1052	1.7821e-07	9.04e-05
GO:0002274	myeloid leukocyte activation	634	1.6358	6.7246	4.1965e-07	0.00018353
GO:0045055	regulated exocytosis	783	2.0202	5.9399	4.2455e-07	0.00018353
GO:0031640	killing of cells of other organism	60	0.15481	32.298	4.4219e-07	0.00018353
GO:0044364	disruption of cells of other organism	60	0.15481	32.298	4.4219e-07	0.00018353
GO:0002252	immune effector process	1141	2.9439	4.7556	5.4894e-07	0.00021793
GO:0030216	keratinocyte differentiation	295	0.76113	10.511	7.4212e-07	0.00028235
GO:0002366	leukocyte activation involved in immune response	693	1.788	6.1521	1.0111e-06	0.00036929
GO:0002263	cell activation involved in immune response	697	1.7983	6.1168	1.0699e-06	0.00037573
GO:0006887	exocytosis	894	2.3066	5.2024	1.7274e-06	0.00058419
GO:0030855	epithelial cell differentiation	747	1.9273	5.7074	2.1046e-06	0.00066707
GO:0050829	defense response to Gram-negative bacterium	82	0.21157	23.633	2.1186e-06	0.00066707
GO:0002443	leukocyte mediated immunity	760	1.9609	5.6097	2.4882e-06	0.00075274
GO:0009913	epidermal cell differentiation	348	0.89788	8.9099	2.5556e-06	0.00075274
GO:0098542	defense response to other organism	473	1.2204	7.3747	2.6462e-06	0.00075507
GO:0051873	killing by host of symbiont cells	12	0.030961	96.895	3.4631e-06	0.00095823
GO:0043901	negative regulation of multi-organism process	165	0.42572	14.094	3.8704e-06	0.0010394
GO:0051852	disruption by host of symbiont cells	13	0.033541	89.442	4.4939e-06	0.0011724
GO:0045321	leukocyte activation	1184	3.0548	4.2555	5.3816e-06	0.0013284
GO:0012501	programmed cell death	2043	5.2712	3.2251	5.3829e-06	0.0013284
GO:0044146	negative regulation of growth of symbiont involved in interaction with host	14	0.036121	83.053	5.7093e-06	0.0013719
GO:0044144	modulation of growth of symbiont involved in interaction with host	15	0.038702	77.516	7.1238e-06	0.0016679
GO:0043588	skin development	409	1.0553	7.5811	8.392e-06	0.0019157
GO:0045109	intermediate filament organization	22	0.056762	52.852	2.3809e-05	0.0046256
GO:0016192	vesicle-mediated transport	1942	5.0106	2.9937	5.8751e-05	0.0097537
GO:0051707	response to other organism	897	2.3144	4.3209	7.3304e-05	0.011743
GO:0034330	cell junction organization	285	0.73533	8.1596	8.498e-05	0.012933
GO:0050832	defense response to fungus	37	0.095464	31.426	0.00011693	0.017221
GO:0070944	neutrophil mediated killing of bacterium	7	0.018061	110.74	0.00013544	0.019323
GO:0042633	hair cycle	113	0.29155	13.72	0.00020166	0.026305
GO:0002376	immune system process	2778	7.1675	2.3718	0.00029621	0.035588
GO:0099133	ATP hydrolysis coupled anion transmembrane transport	11	0.028381	70.469	0.0003524	0.041789
GO:0009605	response to external stimulus	2282	5.8878	2.5476	0.00036685	0.042945
GO-CC
Gene Set	Description	Size	Expect	Ratio	P Value	FDR
GO:0070062	extracellular exosome	2040	4.4055	4.9937	8.1094e-12	4.0168e-09
GO:1903561	extracellular vesicle	2061	4.4509	4.9428	9.9644e-12	4.0168e-09
GO:0043230	extracellular organelle	2063	4.4552	4.938	1.0161e-11	4.0168e-09
GO:0030141	secretory granule	831	1.7946	7.2439	9.5638e-09	2.8357e-06
GO:0070820	tertiary granule	163	0.35201	19.886	5.0994e-08	1.2096e-05
GO:0099503	secretory vesicle	976	2.1078	6.1677	6.4279e-08	1.2706e-05
GO:0034774	secretory granule lumen	320	0.69107	11.576	3.3343e-07	5.6493e-05
GO:0060205	cytoplasmic vesicle lumen	336	0.72562	11.025	4.8273e-07	6.5061e-05
GO:0031983	vesicle lumen	337	0.72778	10.992	4.9372e-07	6.5061e-05
GO:1904724	tertiary granule lumen	55	0.11878	33.677	5.8266e-06	0.00069016
GO:0044433	cytoplasmic vesicle part	1462	3.1573	4.1174	6.4012e-06	0.00069016
GO:0035580	specific granule lumen	62	0.13389	29.874	9.4277e-06	0.00093177
GO:0001533	cornified envelope	65	0.14037	28.496	1.1389e-05	0.001039
GO:0030057	desmosome	25	0.05399	55.566	2.0682e-05	0.001752
GO:0042581	specific granule	160	0.34553	14.47	2.2998e-05	0.0018184
GO:0031410	cytoplasmic vesicle	2256	4.872	3.0788	3.3691e-05	0.0023881
GO:0097708	intracellular vesicle	2259	4.8785	3.0747	3.4231e-05	0.0023881
GO:0035578	azurophil granule lumen	90	0.19436	20.58	4.1355e-05	0.0027248
GO:0005882	intermediate filament	195	0.42112	11.873	5.9215e-05	0.0036962
GO:0045111	intermediate filament cytoskeleton	232	0.50102	9.9796	0.00013432	0.0079653
GO:0005766	primary lysosome	155	0.33474	11.95	0.00033861	0.018254
GO:0042582	azurophil granule	155	0.33474	11.95	0.00033861	0.018254
GO:0030667	secretory granule membrane	293	0.63276	7.9019	0.00039585	0.020412
GO:0005775	vacuolar lumen	170	0.36713	10.895	0.00048042	0.023741
GO:0071682	endocytic vesicle lumen	18	0.038872	51.45	0.00067983	0.032251
GO-MF
Gene Set	Description	Size	Expect	Ratio	P Value	FDR
GO:0005539	glycosaminoglycan binding	219	0.51233	11.711	1.09e-05	0.02058
GO:0008201	heparin binding	160	0.3743	13.358	3.3833e-05	0.031938
GO:0001530	lipopolysaccharide binding	33	0.0772	38.86	6.152e-05	0.038716
GO:0005200	structural constituent of cytoskeleton	101	0.23628	16.929	8.869e-05	0.041862
GO:1901681	sulfur compound binding	240	0.56145	8.9054	0.00022902	0.078061
GO:0015643	toxic substance binding	11	0.025733	77.72	0.00028942	0.078061
GO:0043225	ATPase-coupled anion transmembrane transporter activity	11	0.025733	77.72	0.00028942	0.078061
GO:0005198	structural molecule activity	792	1.8528	4.3178	0.00041494	0.097927
GO:0004252	serine-type endopeptidase activity	182	0.42577	9.3948	0.0008387	0.17594
GO:0008289	lipid binding	718	1.6797	4.1675	0.0012309	0.21643
Pathway (Reactome)
Gene Set	Description	Size	Expect	Ratio	P Value	FDR
R-HSA-6809371	Formation of the cornified envelope	129	0.44002	18.181	9.0925e-09	1.5739e-05
R-HSA-6798695	Neutrophil degranulation	479	1.6339	6.7324	3.2142e-07	0.00026859
R-HSA-6805567	Keratinization	214	0.72996	10.96	4.655e-07	0.00026859
R-HSA-351906	Apoptotic cleavage of cell adhesion proteins	11	0.037521	79.955	5.9027e-06	0.0025544
R-HSA-168249	Innate Immune System	1053	3.5918	3.3409	0.00011794	0.040831
R-HSA-111465	Apoptotic cleavage of cellular proteins	38	0.12962	23.145	0.00028328	0.077949
R-HSA-6803157	Antimicrobial peptides	97	0.33087	12.089	0.00031522	0.077949
R-HSA-446107	Type I hemidesmosome assembly	11	0.037521	53.303	0.0006103	0.13205
R-HSA-75153	Apoptotic execution phase	52	0.17737	16.913	0.00071819	0.13813
R-HSA-1266738	Developmental Biology	1074	3.6634	2.7297	0.002457	0.42531

## Sheet: S7
Table S7. Gene ontology (GO) biological processes (BP), cellular components (CC), molecular functions (MF), and pathways for Treated 2+ vs Healthy (FDR < 0.05).
GO-BP
Gene Set	Description	Size	Expect	Ratio	P Value	FDR
GO:0002682	regulation of immune system process	1400	2.1001	4.2855	0.00012001	0.83345
GO:0006955	immune response	1919	2.8786	3.4739	0.00025482	0.83345
GO:0002376	immune system process	2778	4.1672	2.8797	0.00027383	0.83345
GO:0006909	phagocytosis	238	0.35701	11.204	0.00040516	0.92488
GO:0098657	import into cell	792	1.188	5.0503	0.00092007	1
GO:0002252	immune effector process	1141	1.7116	4.0898	0.0011138	1
GO:0006952	defense response	1518	2.2771	3.5133	0.0012243	1
GO:0016192	vesicle-mediated transport	1942	2.9131	3.0895	0.0013862	1
GO:0043277	apoptotic cell clearance	40	0.060002	33.332	0.0016272	1
GO:0001775	cell activation	1335	2.0026	3.4955	0.0027669	1
GO-CC
Gene Set	Description	Size	Expect	Ratio	P Value	FDR
GO:0044433	cytoplasmic vesicle part	1462	1.9941	4.0119	0.00048863	0.30752
GO:0034774	secretory granule lumen	320	0.43646	9.1646	0.00085557	0.30752
GO:0060205	cytoplasmic vesicle lumen	336	0.45829	8.7282	0.0010258	0.30752
GO:0031983	vesicle lumen	337	0.45965	8.7023	0.0010372	0.30752
GO:0019897	extrinsic component of plasma membrane	162	0.22096	13.577	0.001345	0.31904
GO:0099503	secretory vesicle	976	1.3312	4.5072	0.0016287	0.32193
GO:1904724	tertiary granule lumen	55	0.075017	26.661	0.0025334	0.42922
GO:0035580	specific granule lumen	62	0.084565	23.651	0.0032073	0.43586
GO:0012506	vesicle membrane	767	1.0461	4.7794	0.0033076	0.43586
GO:0098552	side of membrane	481	0.65606	6.097	0.0037947	0.45006
GO-MF
Gene Set	Description	Size	Expect	Ratio	P Value	FDR
GO:0001848	complement binding	19	0.027353	73.118	0.00033461	0.23378
GO:0008329	signaling pattern recognition receptor activity	20	0.028793	69.463	0.00037147	0.23378
GO:0038187	pattern recognition receptor activity	20	0.028793	69.463	0.00037147	0.23378
GO:0004857	enzyme inhibitor activity	361	0.5197	7.6967	0.0016306	0.51918
GO:0004866	endopeptidase inhibitor activity	167	0.24042	12.478	0.0017119	0.51918
GO:0030414	peptidase inhibitor activity	174	0.25049	11.976	0.0019249	0.51918
GO:0061135	endopeptidase regulator activity	174	0.25049	11.976	0.0019249	0.51918
GO:0005044	scavenger receptor activity	50	0.071981	27.785	0.0023327	0.55051
GO:0004869	cysteine-type endopeptidase inhibitor activity	57	0.082059	24.373	0.0030205	0.63364
GO:0061134	peptidase regulator activity	212	0.3052	9.8296	0.0033696	0.63619
Pathway (Reactome)
Gene Set	Description	Size	Expect	Ratio	P Value	FDR
R-HSA-1236977	Endosomal/Vacuolar pathway	11	0.02293	87.223	0.00022556	0.39045
R-HSA-983170	Antigen Presentation: Folding, assembly and peptide loading of class I MHC	25	0.052113	38.378	0.0012088	1
R-HSA-2173782	Binding and Uptake of Ligands by Scavenger Receptors	42	0.08755	22.844	0.0033957	1
R-HSA-168256	Immune System	1997	4.1628	2.4022	0.0040153	1
R-HSA-913531	Interferon Signaling	197	0.41065	7.3055	0.0075941	1
R-HSA-909733	Interferon alpha/beta signaling	69	0.14383	13.905	0.0089432	1
R-HSA-173736	Alternative complement activation	5	0.010423	95.945	0.010381	1
R-HSA-9018896	Biosynthesis of E-series 18(S)-resolvins	5	0.010423	95.945	0.010381	1
R-HSA-1280215	Cytokine Signaling in Immune system	688	1.4341	3.4864	0.012064	1
R-HSA-9018679	Biosynthesis of EPA-derived SPMs	6	0.012507	79.955	0.012445	1

## Sheet: S8
Table S8. Gene ontology (GO) biological processes (BP), cellular components (CC), molecular functions (MF), and pathways for Treated 2+ vs Treated 1 (FDR < 0.05).
GO-BP
Gene Set	Description	Size	Expect	Ratio	P Value	FDR
GO:0070268	cornification	111	0.35965	25.024	7.6827e-11	6.5632e-07
GO:0043312	neutrophil degranulation	482	1.5617	8.9643	2.6715e-10	6.5632e-07
GO:0002283	neutrophil activation involved in immune response	485	1.5715	8.9089	2.8974e-10	6.5632e-07
GO:0042119	neutrophil activation	494	1.6006	8.7466	3.6842e-10	6.5632e-07
GO:0002446	neutrophil mediated immunity	496	1.6071	8.7113	3.8837e-10	6.5632e-07
GO:0036230	granulocyte activation	500	1.6201	8.6416	4.3127e-10	6.5632e-07
GO:0043299	leukocyte degranulation	529	1.714	8.1679	8.975e-10	1.1707e-06
GO:0002275	myeloid cell activation involved in immune response	539	1.7464	8.0164	1.1437e-09	1.2606e-06
GO:0002443	leukocyte mediated immunity	760	2.4625	6.4975	1.2425e-09	1.2606e-06
GO:0002444	myeloid leukocyte mediated immunity	548	1.7756	7.8847	1.4166e-09	1.2935e-06
GO:0006887	exocytosis	894	2.8967	5.8688	1.563e-09	1.2974e-06
GO:0045055	regulated exocytosis	783	2.537	6.3066	1.9108e-09	1.454e-06
GO:0043588	skin development	409	1.3252	9.0551	5.4933e-09	3.8584e-06
GO:0016192	vesicle-mediated transport	1942	6.2923	3.6552	8.735e-09	5.57e-06
GO:0002274	myeloid leukocyte activation	634	2.0542	6.8152	9.1502e-09	5.57e-06
GO:0032940	secretion by cell	1472	4.7695	4.1933	1.2597e-08	7.1888e-06
GO:0002366	leukocyte activation involved in immune response	693	2.2454	6.2349	2.8092e-08	1.441e-05
GO:0002263	cell activation involved in immune response	697	2.2584	6.1992	3.0192e-08	1.441e-05
GO:0030216	keratinocyte differentiation	295	0.95584	10.462	3.1189e-08	1.441e-05
GO:0031424	keratinization	219	0.70959	12.683	3.1562e-08	1.441e-05
GO:0046903	secretion	1605	5.2004	3.8459	5.4226e-08	2.3578e-05
GO:0002252	immune effector process	1141	3.697	4.5983	5.9219e-08	2.4579e-05
GO:0045321	leukocyte activation	1184	3.8363	4.4313	1.0137e-07	4.0244e-05
GO:0009913	epidermal cell differentiation	348	1.1276	8.8687	1.4654e-07	5.5751e-05
GO:0001775	cell activation	1335	4.3256	3.9301	5.6377e-07	0.00020591
GO:0045109	intermediate filament organization	22	0.071283	56.114	6.8946e-07	0.00024213
GO:0006955	immune response	1919	6.2178	3.2166	1.0067e-06	0.00034046
GO:0008544	epidermis development	455	1.4743	6.7831	1.7002e-06	0.00055444
GO:0045104	intermediate filament cytoskeleton organization	48	0.15553	25.719	1.723e-05	0.0054252
GO:0045103	intermediate filament-based process	49	0.15877	25.194	1.8717e-05	0.0056968
GO:0044110	growth involved in symbiotic interaction	18	0.058322	51.438	2.5351e-05	0.0072336
GO:0044116	growth of symbiont involved in interaction with host	18	0.058322	51.438	2.5351e-05	0.0072336
GO:0019730	antimicrobial humoral response	110	0.35641	14.029	2.7944e-05	0.007732
GO:0034113	heterotypic cell-cell adhesion	58	0.18793	21.285	3.668e-05	0.0098506
GO:0043062	extracellular structure organization	400	1.2961	6.1726	4.0651e-05	0.010605
GO:0006952	defense response	1518	4.9185	3.0497	6.5225e-05	0.016544
GO:0002376	immune system process	2778	9.0011	2.3331	7.936e-05	0.019585
GO:0007155	cell adhesion	1369	4.4357	3.1562	8.444e-05	0.02029
GO:0022610	biological adhesion	1377	4.4617	3.1378	8.9921e-05	0.021053
GO:0010951	negative regulation of endopeptidase activity	233	0.75495	7.9475	0.00010321	0.02356
GO:0098657	import into cell	792	2.5662	3.8968	0.00019826	0.037715
GO-CC
Gene Set	Description	Size	Expect	Ratio	P Value	FDR
GO:0070820	tertiary granule	163	0.45391	24.234	6.5947e-13	7.8213e-10
GO:0099503	secretory vesicle	976	2.7179	6.9907	4.4529e-12	2.6406e-09
GO:0044433	cytoplasmic vesicle part	1462	4.0713	5.4037	8.0778e-12	3.1934e-09
GO:0030141	secretory granule	831	2.3141	7.3463	3.8488e-11	1.1412e-08
GO:0031410	cytoplasmic vesicle	2256	6.2823	3.6611	5.5396e-09	1.1237e-06
GO:0097708	intracellular vesicle	2259	6.2907	3.6562	5.685e-09	1.1237e-06
GO:0070062	extracellular exosome	2040	5.6808	3.6966	3.1091e-08	4.9923e-06
GO:1903561	extracellular vesicle	2061	5.7393	3.659	3.7243e-08	4.9923e-06
GO:0043230	extracellular organelle	2063	5.7449	3.6554	3.7884e-08	4.9923e-06
GO:0034774	secretory granule lumen	320	0.89111	10.1	2.1079e-07	2.5e-05
GO:0042581	specific granule	160	0.44556	15.711	2.8088e-07	2.9755e-05
GO:0060205	cytoplasmic vesicle lumen	336	0.93567	9.6188	3.1809e-07	2.9755e-05
GO:0031983	vesicle lumen	337	0.93845	9.5903	3.2615e-07	2.9755e-05
GO:1904724	tertiary granule lumen	55	0.15316	32.646	4.2541e-07	3.6039e-05
GO:0030057	desmosome	25	0.069618	57.456	6.4298e-07	4.9754e-05
GO:0030659	cytoplasmic vesicle membrane	746	2.0774	5.7764	6.7122e-07	4.9754e-05
GO:0035580	specific granule lumen	62	0.17265	28.96	7.7986e-07	5.4407e-05
GO:0012506	vesicle membrane	767	2.1359	5.6183	9.0019e-07	5.9313e-05
GO:0001533	cornified envelope	65	0.18101	27.623	9.8925e-07	6.175e-05
GO:0030667	secretory granule membrane	293	0.81592	9.8048	1.3397e-06	7.9442e-05
GO:0045111	intermediate filament cytoskeleton	232	0.64606	10.835	3.3931e-06	0.00019163
GO:0099512	supramolecular fiber	914	2.5452	4.7147	5.5707e-06	0.00030031
GO:0099081	supramolecular polymer	921	2.5647	4.6789	6.0226e-06	0.00030093
GO:0099080	supramolecular complex	922	2.5675	4.6738	6.0897e-06	0.00030093
GO:0005882	intermediate filament	195	0.54302	11.049	1.6134e-05	0.00076541
GO:0101003	ficolin-1-rich granule membrane	60	0.16708	23.94	2.3074e-05	0.0010525
GO:0005856	cytoskeleton	2128	5.9259	2.8688	3.3874e-05	0.001488
GO:0099513	polymeric cytoskeletal fiber	692	1.927	4.6704	0.00010697	0.0045311
GO:0101002	ficolin-1-rich granule	183	0.5096	9.8115	0.00015161	0.0062001
GO:0070161	anchoring junction	554	1.5427	4.5374	0.00080515	0.03183
GO:0070821	tertiary granule membrane	72	0.2005	14.963	0.0010574	0.040456
GO:0044430	cytoskeletal part	1621	4.514	2.6584	0.0013146	0.048724
GO:0098805	whole membrane	1630	4.5391	2.6437	0.0013794	0.049573
GO-MF
Gene Set	Description	Size	Expect	Ratio	P Value	FDR
GO:0004867	serine-type endopeptidase inhibitor activity	90	0.28613	17.475	9.5892e-06	0.018104
GO:0043394	proteoglycan binding	35	0.11127	26.961	0.0001848	0.084492
GO:0004866	endopeptidase inhibitor activity	167	0.53092	9.4176	0.00018486	0.084492
GO:0030414	peptidase inhibitor activity	174	0.55318	9.0387	0.00022376	0.084492
GO:0061135	endopeptidase regulator activity	174	0.55318	9.0387	0.00022376	0.084492
GO:0015643	toxic substance binding	11	0.034971	57.19	0.00053551	0.14951
GO:0061134	peptidase regulator activity	212	0.67398	7.4186	0.00055433	0.14951
GO:0097110	scaffold protein binding	58	0.18439	16.27	0.00082743	0.19527
GO:0019215	intermediate filament binding	15	0.047688	41.94	0.001014	0.21272
GO:0030280	structural constituent of epidermis	16	0.050867	39.318	0.0011566	0.21609
Pathway (Reactome)
Gene Set	Description	Size	Expect	Ratio	P Value	FDR
R-HSA-6798695	Neutrophil degranulation	479	2.0877	7.1848	8.0214e-10	1.3885e-06
R-HSA-6809371	Formation of the cornified envelope	129	0.56225	16.007	3.4577e-09	2.9927e-06
R-HSA-6805567	Keratinization	214	0.93273	9.6491	2.8142e-07	0.00016238
R-HSA-168249	Innate Immune System	1053	4.5895	3.4862	4.7341e-06	0.0020487
R-HSA-168256	Immune System	1997	8.704	2.5276	7.9228e-06	0.0027429
R-HSA-351906	Apoptotic cleavage of cell adhesion proteins	11	0.047944	62.573	1.2478e-05	0.0035999
R-HSA-8949275	RUNX3 Regulates Immune Response and Cell Migration	6	0.026151	76.478	0.0002757	0.068176
R-HSA-111465	Apoptotic cleavage of cellular proteins	38	0.16562	18.113	0.00058749	0.12712
R-HSA-446107	Type I hemidesmosome assembly	11	0.047944	41.715	0.00099695	0.19175
R-HSA-75153	Apoptotic execution phase	52	0.22664	13.237	0.0014749	0.2553

## Sheet: S9
Table S9. STRING identifiers and interaction scores (combined_score > 0.400).
node1	node2	node1_string_id	node2_string_id	neighborhood_on_chromosome	gene_fusion	phylogenetic_cooccurrence	homology	coexpression	experimentally_determined_interaction	database_annotated	automated_textmining	combined_score
KRT14	KRT5	9606.ENSP00000167586	9606.ENSP00000252242	0	0	0	0.781	0.742	0.991	0.9	0.95	0.999
KRT10	KRT5	9606.ENSP00000269576	9606.ENSP00000252242	0	0	0	0.795	0.084	0.945	0.9	0.745	0.995
DSG1	PKP1	9606.ENSP00000257192	9606.ENSP00000263946	0	0	0	0	0.119	0.388	0.9	0.891	0.993
RAB3IP	RAB8A	9606.ENSP00000447300	9606.ENSP00000300935	0	0	0	0	0	0.575	0.9	0.859	0.993
DSG1	DSP	9606.ENSP00000257192	9606.ENSP00000369129	0	0	0	0	0.063	0.056	0.9	0.924	0.992
DSP	PKP1	9606.ENSP00000369129	9606.ENSP00000263946	0	0	0	0	0.117	0.382	0.9	0.884	0.992
SERPINB3	SERPINB4	9606.ENSP00000283752	9606.ENSP00000343445	0	0	0.449	0.984	0.955	0.832	0	0.78	0.992
CTSG	MPO	9606.ENSP00000216336	9606.ENSP00000225275	0	0	0	0	0.612	0.061	0.9	0.737	0.989
AZU1	MPO	9606.ENSP00000233997	9606.ENSP00000225275	0	0	0	0	0.673	0.061	0.9	0.594	0.985
HLA-A	HLA-C	9606.ENSP00000379873	9606.ENSP00000365402	0	0	0	0.98	0.394	0.754	0.9	0.922	0.984
CAMP	PGLYRP1	9606.ENSP00000296435	9606.ENSP00000008938	0	0	0	0	0.56	0	0.9	0.337	0.968
AZU1	CTSG	9606.ENSP00000233997	9606.ENSP00000216336	0	0	0.422	0.794	0.559	0	0.9	0.731	0.964
MPO	RNASE2	9606.ENSP00000225275	9606.ENSP00000303276	0	0	0	0	0.463	0	0.9	0.398	0.964
CTSG	SERPINB4	9606.ENSP00000216336	9606.ENSP00000343445	0	0	0	0	0	0.435	0.8	0.671	0.959
LTF	PGLYRP1	9606.ENSP00000231751	9606.ENSP00000008938	0	0	0	0	0.149	0	0.9	0.473	0.951
CDH2	SPP1	9606.ENSP00000269141	9606.ENSP00000378517	0	0	0	0	0.065	0	0.9	0.48	0.947
CAMP	LTF	9606.ENSP00000296435	9606.ENSP00000231751	0	0	0	0	0.231	0	0.9	0.355	0.946
CTSG	RNASE2	9606.ENSP00000216336	9606.ENSP00000303276	0	0	0	0	0.333	0	0.9	0.205	0.942
CTSG	SERPINB3	9606.ENSP00000216336	9606.ENSP00000283752	0	0	0	0	0	0.129	0.9	0.337	0.937
KRT25	KRT5	9606.ENSP00000310573	9606.ENSP00000252242	0	0	0	0.662	0.049	0.235	0.9	0.342	0.929
AZU1	RNASE2	9606.ENSP00000233997	9606.ENSP00000303276	0	0	0	0	0.175	0	0.9	0.193	0.927
CAMP	PTX3	9606.ENSP00000296435	9606.ENSP00000295927	0	0	0	0	0	0	0.9	0.267	0.923
ITGA4	SPP1	9606.ENSP00000380227	9606.ENSP00000378517	0	0	0	0	0	0	0.9	0.268	0.923
BDKRB1	CXCL12	9606.ENSP00000216629	9606.ENSP00000379140	0	0	0	0	0	0.162	0.9	0.092	0.917
CXCL12	GNAO1	9606.ENSP00000379140	9606.ENSP00000262494	0	0	0	0	0	0	0.9	0.185	0.915
KRT23	KRT5	9606.ENSP00000209718	9606.ENSP00000252242	0	0	0	0.663	0.112	0	0.9	0.287	0.915
LRG1	LTF	9606.ENSP00000302621	9606.ENSP00000231751	0	0	0	0	0.065	0	0.9	0.172	0.915
AZU1	SERPINB3	9606.ENSP00000233997	9606.ENSP00000283752	0	0	0	0	0	0.129	0.9	0.093	0.914
LTF	PRG3	9606.ENSP00000231751	9606.ENSP00000287143	0	0	0	0	0.069	0	0.9	0.136	0.912
MPO	SERPINB3	9606.ENSP00000225275	9606.ENSP00000283752	0	0	0	0	0	0	0.9	0.155	0.911
LRG1	PTX3	9606.ENSP00000302621	9606.ENSP00000295927	0	0	0	0	0	0	0.9	0.137	0.91
KRT14	KRT23	9606.ENSP00000167586	9606.ENSP00000209718	0	0	0	0.892	0.077	0	0.9	0.534	0.909
LTF	PTX3	9606.ENSP00000231751	9606.ENSP00000295927	0	0	0	0	0	0	0.9	0.136	0.909
LAMB2	SPP1	9606.ENSP00000388325	9606.ENSP00000378517	0	0	0	0	0	0	0.9	0.126	0.908
CEP152	DYNLL1	9606.ENSP00000370337	9606.ENSP00000376297	0	0	0	0	0	0.117	0.9	0	0.907
KRT10	KRT14	9606.ENSP00000269576	9606.ENSP00000167586	0	0	0	0.953	0.077	0	0.9	0.86	0.907
KRT10	KRT23	9606.ENSP00000269576	9606.ENSP00000209718	0	0	0	0.878	0.05	0	0.9	0.57	0.907
PGLYRP1	PRG3	9606.ENSP00000008938	9606.ENSP00000287143	0	0	0	0	0.098	0	0.9	0.054	0.907
CD177	CLEC12A	9606.ENSP00000479536	9606.ENSP00000347916	0	0	0	0	0	0	0.9	0.104	0.906
CEP152	RAB8A	9606.ENSP00000370337	9606.ENSP00000300935	0	0	0	0	0	0	0.9	0.105	0.906
CAMP	PRG3	9606.ENSP00000296435	9606.ENSP00000287143	0	0	0	0	0.098	0	0.9	0	0.905
KRT23	KRT25	9606.ENSP00000209718	9606.ENSP00000310573	0	0	0	0.866	0	0	0.9	0.454	0.905
CDH2	LAMB2	9606.ENSP00000269141	9606.ENSP00000388325	0	0	0	0	0.074	0	0.9	0.047	0.904
CEP152	RAB3IP	9606.ENSP00000370337	9606.ENSP00000447300	0	0	0	0	0	0	0.9	0.085	0.904
PRG3	PTX3	9606.ENSP00000287143	9606.ENSP00000295927	0	0	0	0	0	0	0.9	0.087	0.904
CAMP	LRG1	9606.ENSP00000296435	9606.ENSP00000302621	0	0	0	0	0.069	0	0.9	0	0.902
COL5A3	TLL2	9606.ENSP00000264828	9606.ENSP00000350630	0	0	0	0	0	0.064	0.9	0	0.902
LRG1	PGLYRP1	9606.ENSP00000302621	9606.ENSP00000008938	0	0	0	0	0.062	0	0.9	0.041	0.902
AGO2	HIST1H2AC	9606.ENSP00000220592	9606.ENSP00000367022	0	0	0	0	0	0	0.9	0.058	0.901
DYNLL1	RAB8A	9606.ENSP00000376297	9606.ENSP00000300935	0	0	0	0	0	0	0.9	0.054	0.901
DYNLL1	RAB3IP	9606.ENSP00000376297	9606.ENSP00000447300	0	0	0	0	0	0	0.9	0.052	0.901
KRT10	KRT25	9606.ENSP00000269576	9606.ENSP00000310573	0	0	0	0.945	0	0	0.9	0.271	0.901
KRT14	KRT25	9606.ENSP00000167586	9606.ENSP00000310573	0	0	0	0.933	0	0	0.9	0.294	0.901
LRG1	PRG3	9606.ENSP00000302621	9606.ENSP00000287143	0	0	0	0	0	0.06	0.9	0	0.901
PGLYRP1	PTX3	9606.ENSP00000008938	9606.ENSP00000295927	0	0	0	0	0	0	0.9	0.058	0.901
CD177	DYNLL1	9606.ENSP00000479536	9606.ENSP00000376297	0	0	0	0	0	0	0.9	0	0.9
CLEC12A	DYNLL1	9606.ENSP00000347916	9606.ENSP00000376297	0	0	0	0	0	0	0.9	0	0.9
DYNLL1	SPTA1	9606.ENSP00000376297	9606.ENSP00000357129	0	0	0	0	0	0	0.9	0	0.9
RNASE2	SERPINB3	9606.ENSP00000303276	9606.ENSP00000283752	0	0	0	0	0	0	0.9	0	0.9
DNAH17	DYNLL1	9606.ENSP00000374490	9606.ENSP00000376297	0	0	0	0	0	0.363	0.72	0.162	0.837
CAMP	CTSG	9606.ENSP00000296435	9606.ENSP00000216336	0	0	0	0	0.194	0.379	0	0.635	0.801
CDSN	DSG1	9606.ENSP00000365465	9606.ENSP00000257192	0	0	0	0	0.077	0	0	0.728	0.738
KRT14	PKP1	9606.ENSP00000167586	9606.ENSP00000263946	0	0	0	0	0.32	0.377	0	0.397	0.722
CDH2	OCLN	9606.ENSP00000269141	9606.ENSP00000347379	0	0	0	0	0	0	0	0.707	0.707
CTSK	SERPINB3	9606.ENSP00000271651	9606.ENSP00000283752	0	0	0	0	0	0.454	0	0.483	0.706
DSG1	SPINK5	9606.ENSP00000257192	9606.ENSP00000352936	0	0	0	0	0.096	0	0	0.669	0.688
CDH2	DSP	9606.ENSP00000269141	9606.ENSP00000369129	0	0	0	0	0	0.056	0	0.676	0.681
CDSN	SPINK5	9606.ENSP00000365465	9606.ENSP00000352936	0	0	0	0	0.064	0	0	0.673	0.681
CAMP	MPO	9606.ENSP00000296435	9606.ENSP00000225275	0	0	0	0	0.252	0	0	0.577	0.67
CDSN	HLA-C	9606.ENSP00000365465	9606.ENSP00000365402	0	0	0	0	0	0	0	0.669	0.669
AZU1	CAMP	9606.ENSP00000233997	9606.ENSP00000296435	0	0	0	0	0.137	0	0	0.63	0.667
GYPA	SPTA1	9606.ENSP00000354003	9606.ENSP00000357129	0	0	0	0	0.351	0	0	0.49	0.655
CXCL12	SPP1	9606.ENSP00000379140	9606.ENSP00000378517	0	0	0	0	0.062	0	0	0.631	0.639
DSP	OCLN	9606.ENSP00000369129	9606.ENSP00000347379	0	0	0	0	0.087	0	0	0.618	0.637
DMKN	SBSN	9606.ENSP00000342012	9606.ENSP00000430242	0	0	0	0	0	0	0	0.63	0.63
CTSG	CXCL12	9606.ENSP00000216336	9606.ENSP00000379140	0	0	0	0	0	0.379	0	0.423	0.626
ITGA4	LAMB2	9606.ENSP00000380227	9606.ENSP00000388325	0	0	0	0	0.062	0	0.6	0.064	0.618
DSP	KRT5	9606.ENSP00000369129	9606.ENSP00000252242	0	0	0	0	0.085	0.387	0	0.355	0.607
CTSK	SPP1	9606.ENSP00000271651	9606.ENSP00000378517	0	0	0	0	0.062	0	0	0.595	0.604
DSG1	KRT10	9606.ENSP00000257192	9606.ENSP00000269576	0	0	0	0	0.061	0	0	0.592	0.601
KRT5	PKP1	9606.ENSP00000252242	9606.ENSP00000263946	0	0	0	0	0.325	0	0	0.42	0.592
CD163	MARCO	9606.ENSP00000352071	9606.ENSP00000318916	0	0	0	0.601	0.521	0	0	0.366	0.585
LTF	SERPINB3	9606.ENSP00000231751	9606.ENSP00000283752	0	0	0	0	0.055	0	0	0.569	0.575
CD27	ITGA4	9606.ENSP00000266557	9606.ENSP00000380227	0	0	0	0	0.076	0	0	0.557	0.573
HEMGN	SPTA1	9606.ENSP00000480020	9606.ENSP00000357129	0	0	0	0	0.551	0	0	0.089	0.573
CD163	CD200R1	9606.ENSP00000352071	9606.ENSP00000311035	0	0	0	0	0.095	0	0	0.53	0.556
CD163	SPTA1	9606.ENSP00000352071	9606.ENSP00000357129	0	0	0	0	0	0	0	0.548	0.548
CDSN	PKP1	9606.ENSP00000365465	9606.ENSP00000263946	0	0	0	0	0.098	0	0	0.518	0.546
CD163	MPO	9606.ENSP00000352071	9606.ENSP00000225275	0	0	0	0	0.07	0	0	0.53	0.544
DSG1	KRT14	9606.ENSP00000257192	9606.ENSP00000167586	0	0	0	0	0.16	0	0	0.474	0.539
CDH2	CXCL12	9606.ENSP00000269141	9606.ENSP00000379140	0	0	0	0	0	0	0	0.537	0.537
CTSG	LTF	9606.ENSP00000216336	9606.ENSP00000231751	0	0	0	0	0.152	0.067	0	0.443	0.52
CFB	HLA-A	9606.ENSP00000416561	9606.ENSP00000379873	0	0	0	0	0.076	0	0	0.5	0.518
CAMP	S100A8	9606.ENSP00000296435	9606.ENSP00000357722	0	0	0	0	0.351	0	0	0.285	0.516
CD163	CLEC7A	9606.ENSP00000352071	9606.ENSP00000302569	0	0	0	0	0.198	0	0	0.421	0.515
LTF	MPO	9606.ENSP00000231751	9606.ENSP00000225275	0	0	0	0	0.119	0	0	0.472	0.514
LTF	S100A8	9606.ENSP00000231751	9606.ENSP00000357722	0	0	0	0	0.212	0	0	0.396	0.504
CDSN	DSP	9606.ENSP00000365465	9606.ENSP00000369129	0	0	0	0	0.076	0	0	0.484	0.503
DSG1	OCLN	9606.ENSP00000257192	9606.ENSP00000347379	0	0	0	0	0.061	0	0	0.491	0.502
MPO	OCLN	9606.ENSP00000225275	9606.ENSP00000347379	0	0	0	0	0	0	0	0.499	0.499
CTSK	SERPINB4	9606.ENSP00000271651	9606.ENSP00000343445	0	0	0	0	0	0.157	0	0.428	0.497
DSP	KRT14	9606.ENSP00000369129	9606.ENSP00000167586	0	0	0	0	0.119	0.063	0	0.439	0.497
GYPA	MPO	9606.ENSP00000354003	9606.ENSP00000225275	0	0	0	0	0.079	0	0	0.471	0.492
AZU1	LTF	9606.ENSP00000233997	9606.ENSP00000231751	0	0	0	0	0.099	0.067	0	0.441	0.489
AZU1	PGLYRP1	9606.ENSP00000233997	9606.ENSP00000008938	0	0	0	0	0.126	0	0	0.428	0.478
CXCL12	ITGA4	9606.ENSP00000379140	9606.ENSP00000380227	0	0	0	0	0	0	0	0.476	0.476
MPO	PTX3	9606.ENSP00000225275	9606.ENSP00000295927	0	0	0	0	0	0	0	0.474	0.474
CTSK	CXCL12	9606.ENSP00000271651	9606.ENSP00000379140	0	0	0	0	0.136	0	0	0.409	0.468
MPO	S100A8	9606.ENSP00000225275	9606.ENSP00000357722	0	0	0	0	0.232	0	0	0.335	0.468
CD163	CXCL12	9606.ENSP00000352071	9606.ENSP00000379140	0	0	0	0	0.088	0	0	0.44	0.467
CD27	IGLL5	9606.ENSP00000266557	9606.ENSP00000431254	0	0	0	0	0.139	0	0	0.406	0.466
DSG1	KRT5	9606.ENSP00000257192	9606.ENSP00000252242	0	0	0	0	0.125	0	0	0.4	0.452
CDH2	PKP1	9606.ENSP00000269141	9606.ENSP00000263946	0	0	0	0	0.062	0.169	0	0.352	0.451
CTSG	S100A8	9606.ENSP00000216336	9606.ENSP00000357722	0	0	0	0	0.187	0	0	0.349	0.448
CLEC7A	PTX3	9606.ENSP00000302569	9606.ENSP00000295927	0	0	0	0	0	0	0	0.447	0.447
HBG1	SPTA1	9606.ENSP00000327431	9606.ENSP00000357129	0	0	0	0	0.281	0	0	0.255	0.441
CD163	GP5	9606.ENSP00000352071	9606.ENSP00000383931	0	0	0	0	0	0	0	0.439	0.439
CDSN	HLA-A	9606.ENSP00000365465	9606.ENSP00000379873	0	0	0	0	0	0	0	0.438	0.438
CDSN	KRT10	9606.ENSP00000365465	9606.ENSP00000269576	0	0	0	0	0	0	0	0.437	0.437
ANXA4	RAB8A	9606.ENSP00000377833	9606.ENSP00000300935	0	0	0	0	0	0.377	0	0.119	0.427
DSP	KRT10	9606.ENSP00000369129	9606.ENSP00000269576	0	0	0	0	0.063	0.063	0	0.398	0.425
CDH2	KRT14	9606.ENSP00000269141	9606.ENSP00000167586	0	0	0	0	0	0	0	0.421	0.42
CTSG	CTSK	9606.ENSP00000216336	9606.ENSP00000271651	0	0	0	0	0	0	0	0.416	0.416
MPO	PGLYRP1	9606.ENSP00000225275	9606.ENSP00000008938	0	0	0	0	0.153	0	0	0.337	0.415
MARCO	S100A8	9606.ENSP00000318916	9606.ENSP00000357722	0	0	0	0	0.361	0	0	0.121	0.414
CDH2	KRT5	9606.ENSP00000269141	9606.ENSP00000252242	0	0	0	0	0	0	0	0.412	0.412
CXCL12	IGLL5	9606.ENSP00000379140	9606.ENSP00000431254	0	0	0	0	0	0.325	0	0.162	0.41
CFB	LRG1	9606.ENSP00000416561	9606.ENSP00000302621	0	0	0	0	0.064	0.099	0	0.355	0.408
DSG1	SBSN	9606.ENSP00000257192	9606.ENSP00000430242	0	0	0	0	0.091	0	0	0.375	0.408
CASS4	MS4A8	9606.ENSP00000353462	9606.ENSP00000300226	0	0	0	0	0	0	0	0.405	0.405
